**Title: Olfactory learning primes the heat shock transcription factor HSF-1 to enhance the expression of molecular chaperone genes in *C. elegans***

**Authors:** Felicia K. Ooi<sup>1</sup> and Veena Prahlad<sup>1\*</sup>

**Affiliations:** <sup>1</sup>Department of Biology, Aging Mind and Brain Initiative, 143 Biology Building East, 338 BBE, University of Iowa, Iowa City, IA.

\* Corresponding author email: [veena-prahlad@uiowa.edu](mailto:veena-prahlad@uiowa.edu)

## Abstract

Learning, a process by which animals modify their behavior as a result of experience, allows organisms to synthesize information from their surroundings to acquire resources and predict danger. Here we show that prior encounter with the odor of pathogenic bacteria prepares *Caenorhabditis elegans* to survive actual exposure to the pathogen by increasing HSF-1-dependent expression of genes encoding molecular chaperones. Learning-mediated enhancement of chaperone gene expression requires serotonin. Serotonin primes HSF-1 to enhance the expression of molecular chaperone genes by promoting its localization to RNA polymerase II-enriched nuclear loci, even prior to transcription. HSF-1-dependent chaperone gene expression ensues, however, only if and when animals encounter the pathogen. Thus, learning equips *C. elegans* to better survive environmental dangers by pre-emptively and specifically initiating transcriptional mechanisms throughout the whole organism. These studies provide one plausible basis for the protective role of environmental enrichment in disease.

## 1 **Introduction**

2 The ability to accurately predict danger and implement appropriate protective responses is critical for  
3 survival. Many animals possess neuronal circuits to detect unfavorable conditions and implement an  
4 avoidance response. In addition, all cells possess conserved mechanisms to repair and protect their  
5 macromolecules from damage that occurs under adverse conditions. One such mechanism present in all  
6 cells to protect against protein damage is the Heat Shock Response (HSR) (1-4). The HSR is mediated by  
7 the transcription factor Heat Shock Factor 1 (HSF1), which, in response to a variety of stressors, increases  
8 the expression of cytoprotective molecular chaperones or so-called heat shock proteins (HSPs) to maintain  
9 protein stability and help degrade proteins that misfold and aggregate under stressful conditions (1-4). HSF1  
10 activity is essential for all organisms to adapt to changing environments. The HSR and HSF1 can be  
11 activated autonomously by single cells in response to proteotoxic stressors (1-3). However, within a  
12 metazoan such as the nematode *Caenorhabditis elegans*, HSF1 and the cellular response to protein damage  
13 are not autonomously controlled by individual cells, but instead are under the regulation of the animals'  
14 nervous system (5-11). The biological role for this regulation is unclear. We discovered that one  
15 mechanism by which *C. elegans* HSF1 (HSF-1) is regulated is through the neurosensory release of the  
16 bioamine serotonin (5-hydroxytryptamine, 5-HT (7)). In vertebrates and invertebrates, serotonergic  
17 systems play a central role in neurophysiological processes underlying learning and memory, allowing  
18 animals to learn about threats in their environment and form memories that can be later recalled to modify  
19 behavior (12-23). Therefore, we asked whether control by the serotonergic-based learning circuitry allowed  
20 *C. elegans* to modulate HSF-1 activity in response to prior experience, so as to better combat threats in its  
21 environment.

22  
23 Here we show that in *C. elegans*, olfactory experience of specific odorants released by the toxic bacteria  
24 *Pseudomonas aeruginosa* PA14 primes HSF-1-dependent transcription of cytoprotective *hsp* genes, such  
25 that the expression of these genes is enhanced if and when animals subsequently encounter the pathogen.  
26 This priming requires 5-HT and occurs through a novel mechanism, whereby HSF-1 is pre-emptively

27 mobilized to the vicinity of RNA polymerase II (pol II) in nuclei throughout the animal, in preparation for  
28 active transcription. Animals that cannot synthesize 5-HT are deficient in re-localizing HSF-1 in response  
29 to olfactory stimuli, and do not show this learned enhancement of *hsp* expression. Olfactory priming of  
30 HSF-1 is protective, allowing animals that had previously experienced the smell of *P. aeruginosa* to better  
31 respond to a subsequent exposure to the pathogen. Thus neuronal control over the HSF-1-mediated defense  
32 mechanism of cells allows learning and memory to elicit anticipatory changes in the stress-responsiveness  
33 of cells, facilitating survival. X

34

## 35 **Results**

### 36 **Olfactory exposure to odorants made by the toxic bacteria *Pseudomonas aeruginosa* PA14 accelerates** 37 **the avoidance response of *C. elegans* to the pathogen.**

38 To test whether animals can ‘learn’ to activate HSF-1 based on prior experience, we exploited previous  
39 findings that *C. elegans* have an innate aversion to specific pathogens, and display experience-dependent  
40 plasticity to avoid ingesting pathogenic bacteria such as *Pseudomonas aeruginosa* PA14 (15, 24). Thus,  
41 although animals are typically attracted to novel bacteria upon initial encounter, be it pathogenic bacteria  
42 such as PA14 or non-pathogenic *E. coli* strains (25, 26), animals previously exposed to a lawn of pathogenic  
43 PA14 will avoid PA14 lawns upon subsequent exposure. This learned avoidance behavior requires the  
44 olfactory nervous system and 5-HT (15, 24, 27, 28). We used this information to set up a paradigm whereby  
45 we could train animals to avoid PA14 using odor alone, circumventing any physical damage that could be  
46 inflicted by actual exposure (Fig. S1A). We then asked if olfactory training on the odorant of this toxic  
47 bacteria could enhance the transcriptional activity of HSF-1 and promote survival if animals were to  
48 subsequently encounter the pathogen. Animals were trained by exposing them to the odor of PA14 cultures  
49 for 30 minutes. Controls were mock-trained by exposure to the odor of the standard *E. coli* OP50 strain on  
50 which animals are typically raised. To assess whether olfactory pre-exposure was sufficient to elicit learned  
51 avoidance behavior, trained and mock-trained animals were then given a choice between PA14 lawns and  
52 OP50 lawns. Behavioral preference was quantified by calculating a choice index (CI) for PA14, wherein a

53 CI of 1.0 indicates maximal preference and a CI of -1.0 indicates maximal aversion (Fig. S1A). Due to the  
54 variability inherent to behavioral assays, all avoidance assays were conducted, and are represented, as  
55 pairwise comparisons between control and experimental populations of *C. elegans* evaluated in parallel. As  
56 previously reported (15), when faced with a choice between OP50 or PA14, naïve animals initially preferred  
57 the novel bacteria and accumulated within the first 5 minutes on PA14 (Fig. S1B). However, after 45  
58 minutes *C. elegans* began to avoid PA14 and by 4 hours, 80% of the animals have left PA14 and moved to  
59 the OP50 lawn (Fig. S1B). Animals exposed to OP50 odor (mock-trained, control animals) behaved like  
60 naïve animals and also initially accumulated on PA14 and then began to leave the lawn by 1 hour (Fig. 1A).  
61 In contrast, animals exposed to the odor of PA14 avoided the PA14 lawn significantly earlier and left within  
62 the first 5 minutes (Fig. 1A). The avoidance of PA14 following pre-exposure to PA14 odorants appeared  
63 to reflect an innate response of the animals to PA14. It was also not a simple consequence of adaptation to  
64 the smell. This was inferred from the behavior of animals exposed for similar durations to the odor of  
65 another novel, but non-pathogenic bacteria, HT115. In this case animals did not avoid HT115 when given  
66 a choice between HT115 and OP50 but remained on HT115 throughout the analysis (Fig. S1C). This  
67 enhanced avoidance response was also specific to the pathogen in that animals responded to the pathogen  
68 whose odorants they had previously experienced. Pre-exposure of animals to the odor of PA14 did not  
69 trigger avoidance of another known *C. elegans* pathogen, *Serratia marcescens* strain DB11: animals pre-  
70 exposed to PA14 or OP50 odorants behaved like naïve animals and remained on DB11 throughout the  
71 analysis (Fig. S1D). These data taken together point to the existence of sophisticated mechanisms by which  
72 *C. elegans* discriminate between bacteria in their environment, and show that prior exposure to odorants  
73 generated by a pathogen such as *P. aeruginosa* can induce *C. elegans* to accelerate their avoidance of that  
74 specific pathogen upon subsequent encounter.

75

76 **The HSF-1-dependent expression of heat shock protein genes is enhanced by prior olfactory exposure**  
77 **to PA14 odorants.**

78 Exposure to PA14 is known to be toxic, causing increased protein damage (29, 30) and ultimately, death  
79 (31, 32). Consistent with this, survival on PA14 was HSF-1-dependent as the knock-down of *hsf-1* by RNA  
80 interference using standard methods for feeding double stranded RNA to *C. elegans*, accelerated death upon  
81 PA14 exposure (Fig. 1B; Table S1, also see Materials and Methods and Fig. S4A for confirmation of RNAi  
82 induced knockdown). To assess whether training by PA14 odorants modulated the HSF-1 transcriptional  
83 response, we placed animals exposed to OP50 odorants (controls) or PA14 odorants on PA14 lawns that  
84 covered the surface area that the animals explored, so animals could not implement their avoidance response.  
85 Under these conditions, HSF-1 was indeed activated: all animals placed on PA14 lawns for only 10 minutes  
86 increased HSF-1-dependent expression of the inducible *hsp70* F44E5.4/F44E5.5 genes, and the small heat  
87 shock proteins *hsp-16.2* and *hsp-16.41* as measured using qRT-PCR (Figs. 1C-E and Fig. S1E). Pre-  
88 exposure to the odor of PA14, however, enhanced this HSF-1-dependent transcriptional response (Figs. 1C-  
89 E; Table S2): the amounts of all three chaperone mRNAs were approximately two-fold higher in animals  
90 that were first pre-exposed to the odor of PA14, compared to control animals pre-exposed to the smell of  
91 OP50 (Figs. 1C-E; Table S2). This suggested that HSF-1-mediated gene expression could be enhanced by  
92 prior experience of signals that were predictive of danger. Of note, pre-exposure to the odor of PA14 did  
93 not, in itself, induce chaperone expression and animals exposed to the odor of PA14 had low basal  
94 chaperone expression similar to control animals (Figs. 1C-E; Table S2).

95

96 *P. aeruginosa* secretes several molecules that alter the behavior of other organisms. The “grape-like”  
97 odorant 2-aminoacetophenone (2AA) is one such compound synthesized relatively early in the growth  
98 cycle, and is enriched when *P. aeruginosa* infects animal tissue, such as wounds of human burn victims  
99 or the lungs of patients with cystic fibrosis (33, 34). 2AA is responsible for the attractive behavior of  
100 *Drosophila melanogaster* towards the pathogen (33, 35) as well as the aversive behavior of vertebrate  
101 species such as birds and mice from *Pseudomonas* (36, 37). We tested whether this compound was, at  
102 least in part, responsible for the learned enhanced aversion of *C. elegans* to PA14. Pre-exposure to 2AA  
103 mimicked the results observed in our choice assay although 2AA did not in itself elicit an avoidance

104 response (Fig. S2A): animals that were pre-exposed to the smell of 2AA avoided PA14 lawns by 15  
105 minutes compared to mock-trained, control animals exposed to the ‘odor’ of water who only began to  
106 avoid PA14 lawns by 45 minutes (Fig. 2A). Pre-exposure to 2AA odorant also enhanced the expression of  
107 *hsp70* mRNA when animals were subsequently exposed to PA14 lawns, although in itself, 2AA did not  
108 induce *hsp70* mRNA (Fig. 2B; Table S2). Moreover, the avoidance of 2AA did not appear to be due to  
109 its potential toxicity and prolonged 2AA exposure had no effect on the lifespan of animals, be it  
110 administered as an odor alone (Fig. 2C; Table S3), or mixed into OP50 for direct contact or ingestion  
111 (Fig. 2D; Table S3). The enhancement of PA14-avoidance behavior by 2AA also appeared to be fairly  
112 specific: pre-exposure to another volatile semiochemical secreted by *Pseudomonas*, N-3-oxododecanoyl  
113 homoserine lactone (3OC12-HSL(38)), did not affect subsequent avoidance behavior to PA14 lawns or  
114 enhance *hsp* gene expression (Figs. S2B, S2C; Table S2). Consistent with a role in signaling a potential  
115 threat, pre-exposure to 2AA appeared to facilitate a mechanism by which animals ‘decided’ to activate  
116 HSF-1 only if they subsequently encountered PA14, but not in its absence. This was seen when *C.*  
117 *elegans* that were pre-exposed to 2AA odorant encountered an OP50 lawn instead of a PA14 lawn: under  
118 these conditions, they did not activate HSF-1-dependent *hsp* gene expression (Fig. 2B; Table S2).  
119 However, if animals did encounter PA14, pre-exposure to PA14 odorants conferred a consistent and  
120 significant survival advantage: 63% of the animals pre-exposed to PA14 odor survived after 18 hours of  
121 PA14 exposure, compared to 46% of control, water-exposed animals (Fig. 2E; Table S4). The protection  
122 conferred by pre-exposure to PA14 was also stressor-specific, enhancing survival on PA14 but not upon  
123 prolonged heat stress (Fig. S2D). These data taken together suggest that the prior experience of PA14  
124 odor, mimicked in large part by the odorant 2AA, was enhancing the organism’s ability to survive, not  
125 only by hastening the avoidance behavior of the animal from the pathogen, but also by enhancing the  
126 expression of cytoprotective HSF-1 transcriptional targets upon actual encounter with the pathogen. 2AA  
127 was in itself not toxic, nor aversive, but instead appeared to convey specific information regarding the  
128 bacterial environment of *C. elegans* that prepared them for survival on the pathogen, and conferred in  
129 some unknown way, a degree of specificity to the HSF-1 transcriptional response.

130

131 **Serotonin is required for the enhancement of HSF-1-dependent *hsp* gene expression upon olfactory**  
132 **training.**

133 In *C. elegans* and other organisms, the neuromodulator 5-HT is known to mediate learning (15, 21, 22, 26,  
134 39-42). We therefore tested whether the enhanced behavioral and transcriptional response to PA14 that  
135 occurred following the pre-exposure of *C. elegans* to PA14-derived odors required 5-HT. This was the case.  
136 Compared to the 5 minutes needed for wild-type animals trained by PA14 odor to avoid PA14 lawns,  
137 animals that lacked functional tryptophan hydroxylase or *tph-1* (43), the rate limiting enzyme for 5-HT  
138 synthesis, took 1 hour to avoid PA14 after pre-exposure to the odor of PA14 (Figs. 3A, S3A). This delay  
139 in avoidance was indeed due to the lack of 5-HT, as incubation with exogenous 5-HT, a process known to  
140 load 5-HT into the serotonergic neurons within a few minutes (42) (Fig. S3B), rescued the deficiency in the  
141 learned-response of *tph-1* mutant animals: 5-HT-treated *tph-1* animals trained with PA14 odor acted like  
142 wild-type animals trained with PA14 odor and avoided PA14 lawns by 5 minutes (Figs. 3B, S3C; compare  
143 to Fig. 1A). For reasons we do not understand, but which may be related to the differential role of 5-HT in  
144 modulating innate and learned aversive behavior in other organisms (44), control, mock-trained *tph-1*  
145 animals lacking 5-HT avoided PA14 lawns earlier than wild-type control animals (Fig. S3A; compare to  
146 Fig. 1A). This aberrant behavior was also reversed with exogenous 5-HT treatment and 5-HT-treated *tph-*  
147 *1* animals mock-trained on OP50 odor acted more like wild-type animals exposed to OP50 odor and avoided  
148 PA14 lawns later, by 45 minutes (Figs. S3C, S3D; compare to Fig. 3A). However, this rescue was more  
149 variable and did not reach significance.

150

151 Consistent with the behavioral response, *tph-1* mutant animals were deficient in the enhanced HSF-1-  
152 dependent transcriptional response elicited by pre-exposure to PA14 odor (Fig. 3C; Table S2), although 5-  
153 HT was not required for HSF-1 activation on PA14 *per se*. This was inferred from the observation that *tph-*  
154 *1* mutant animals did induce *hsp70* (F44E5.4/F44E5.5) expression when exposed to PA14 lawns as assessed  
155 by qRT-PCR (Fig. 3C; Table S2). However *tph-1* mutant animals pre-exposed to OP50 or PA14 odors both



156 expressed similar amounts of *hsp70* (F44E5.4/F44E5.5) mRNA upon subsequent encounter with PA14  
157 lawns, and there was no increase in *hsp70* expression based on prior olfactory experience (Fig. 3C; Table  
158 S2). We tested whether treatment with exogenous 5-HT could also reverse this defect. However, consistent  
159 with what we had previously observed upon optogenetic activation of serotonergic neurons (7), exposure  
160 to exogenous 5-HT already induced the expression of *hsp70* (F44E5.4/F44E5.5) mRNA, even without pre-  
161 exposure to PA14 odor (Fig. 3D). Although confirming the role of 5-HT in triggering HSF-1 activity, these  
162 data suggested that the more nuanced-control over HSF-1-mediated gene expression that occurs within the  
163 animal in response to physiological stimuli may be due to a tighter regulation over 5-HT release and  
164 availability.

165  
166 Because 5-HT is synthesized only in neurons in *C. elegans* (39, 43), we tested whether 5-HT-dependent  
167 HSF-1 activation was restricted to neurons. This was not the case. Single molecule fluorescent *in situ*  
168 hybridization (smFISH) used to detect *hsp70* (F44E5.4/F44E5.5) mRNA across the entire organism  
169 indicated that exposure to PA14 induced F44E5.4/F44E5.5 mRNA in all tissue types including neurons,  
170 intestine and germline cells, and mRNA expression was enhanced in all these tissues in wild-type animals  
171 when trained by PA14 odor (Figs. 4A-F). Consistent with the whole animal qRT-PCR data, *tph-1* mutant  
172 animals also induced *hsp70* (F44E5.4/F44E5.5) mRNA when exposed to PA14, but the induction of mRNA  
173 in *tph-1* mutant animals remained the same irrespective of prior olfactory training and was also similar to  
174 that in control, wild-type animals mock trained with OP50 (Figs. 4A-F). Taken together, these studies  
175 showed that both the enhanced avoidance behavior as well as enhanced HSF-1-dependent chaperone gene  
176 expression were mediated by the 5-HT learning circuitry.

177  
178 **Olfactory training and serotonin localize HSF-1 to nuclear bodies in cells throughout the animal in**  
179 **anticipation of PA14 encounter, priming HSF-1-dependent gene expression.**

180 How might olfactory learning enhance HSF-1 transcriptional activity? To answer this, we examined  
181 whether olfactory training modified any of the steps known to accompany HSF-1 activation. HSF1-

182 dependent transcription of *hsp* genes is a multistep process that varies to some extent between species (1,  
183 4, 45-50). In mammalian cells, HSF1-dependent *hsp* expression involves conversion of the HSF1  
184 monomers to trimers, increased phosphorylation and other post-translational modifications, acquisition of  
185 competence to bind heat shock elements (HSEs) on promoters of *hsp* genes and the recruitment of HSF1  
186 to these HSE elements in a manner that is dependent on the chromatin landscape and transcriptional  
187 machinery. We characterized these steps for the transcriptional activation of HSF-1 in *C. elegans* (Fig.  
188 S4 and Figs. S5A, B). Consistent with its role as an essential gene in development (51), *C. elegans* HSF-  
189 1, as detected by an antibody specific for endogenous *C. elegans* HSF-1 (Figs. S4A, B), and by the  
190 localization of a single copy GFP-tagged HSF-1, is constitutively present in nuclei (7, 50, 52) (Fig. S4C)  
191 appears to be phosphorylated (Fig. S4D), and is trimerized (Fig. S4E) even at ambient temperatures.  
192 Electrophoretic mobility shift assays (EMSA) indicated that in accordance with its trimerization  
193 capability at ambient temperatures, *C. elegans* HSF-1 can bind DNA containing canonical *C. elegans* heat  
194 shock elements (HSEs) in vitro (Figs. S5A, B). The ability of *C. elegans* HSF-1 to bind HSE-containing  
195 DNA in vitro does not change with stress-induced transcriptional activation (Figs. S5A, B). However, in  
196 agreement with the lack of expression of inducible *hsp* genes at ambient temperatures in the absence of  
197 stress, *C. elegans* HSF-1 did not constitutively bind the *hsp70* promoter region in vivo as assayed by  
198 chromatin immunoprecipitation and qPCR (ChIP-qPCR) (Fig. S5C). Instead HSF-1 binding to the *hsp70*  
199 (F44E5.4/F44E5.5) promoter in vivo required a stressor such as heat shock which caused transcriptional  
200 activation and an approximately five-fold enrichment of HSF-1 at the *hsp70* (F44E5.4/F44E5.5) region  
201 (Fig. S5C).

202

203 Olfactory pre-exposure to 2AA or PA14 odor did not enhance the ability of HSF-1 to bind DNA in vitro  
204 as assayed by EMSA (Figs. S5A, B), nor did it cause HSF-1 to bind *hsp70* promoter regions in vivo as  
205 seen by ChIP-qPCR (Fig. S5C). HSF-1 appeared to be phosphorylated upon actual exposure of animals  
206 to PA14 lawns, as visualized by its retarded mobility by SDS-PAGE; however, pre-exposure to 2AA did  
207 not induce this post-translational change, and HSF-1 in both control (water-exposed) and 2AA-exposed

208 animals appeared identical by SDS-PAGE analysis (Fig. S5D). Exposure to 2AA or PA14 odor alone,  
209 however, caused a significant fraction of HSF-1 to re-localize into punctate nuclear bodies (Fig. 5A). This  
210 was similar to changes in HSF-1 localization known to occur when HSF-1 is actively transcribing *hsp*  
211 genes upon exposure to stressors such as increased temperatures (7, 50, 52) (Fig. S4C), and PA14 lawns  
212 (Fig. 5A). Therefore, this formation of nuclear bodies upon 2AA exposure alone was surprising, as  
213 exposure to 2AA odor did not induce the transcription of *hsp* genes. The number of nuclei containing  
214 HSF-1 nuclear bodies following exposure of animals to the PA14 odorant 2AA, averaged 8.7%, ranging  
215 from 3 – 42% amongst the germline nuclei where HSF-1 was the easiest to visualize, and was visible in  
216 71% of animals scored (Figs. 5A, B; N=24 animals and 707 nuclei). In comparison, only an average of  
217 2.2% of germline nuclei ranging between 0-10 % (Figs. 5A, B; N=25 animals, 890 nuclei) of control  
218 animals exposed to the odor of water showed any evidence of HSF-1 nuclear bodies. The re-localization  
219 of HSF-1 into nuclear bodies was reversible, and the numbers of HSF-1 nuclear bodies in animals  
220 exposed to PA14 odorants diminished to control levels (3.0%; N= 17 animals and 633 nuclei) following  
221 30 minutes recovery on OP50, and did not differ from that in control water-exposed animals (3.2%; N=  
222 19 animals and 752 nuclei; Figs. 5A, B).

223  
224 The HSF-1-mediated transcriptional ‘memory’ of pre-exposure to PA14 odors that resulted in enhanced  
225 HSF-1-dependent *hsp* gene expression correlated with the presence of HSF-1 nuclear bodies (Figs. 5A,  
226 C). Whereas animals exposed to the PA14 odorant showed the presence of HSF-1 nuclear bodies and  
227 displayed enhanced expression of *hsp* genes when placed on PA14 lawns, animals that were allowed to  
228 recover for 30 minutes on innocuous OP50 lawns after being trained on PA14 odorants, no longer  
229 displayed enhanced *hsp* gene expression when placed on PA14 lawns (Figs. 5A, C; compare with Fig.  
230 1C). In further support of the role of HSF-1 nuclear bodies in the learning-dependent enhancement of  
231 HSF-1 transcription, *tph-1* animals that lacked 5-HT, and were deficient in olfactory experience-mediated  
232 increase in *hsp* gene expression also had markedly fewer HSF-1 nuclear bodies upon olfactory training  
233 (Figs. 5D, E; N=10 animals with 504-545 nuclei per condition). These data, together, indicate that the

234 priming of HSF-1 upon olfactory exposure to PA14 odorants, which resulted in an enhancement of *hsp*  
235 gene expression upon actual encounter with PA14 lawns, was occurring through the mobilization of HSF-  
236 1 to nuclear bodies throughout cells of the animal.

237

### 238 **HSF-1 nuclear bodies co-localize with RNA polymerase II.**

239 Transcription does not occur homogeneously throughout the nucleus, but rather occurs at specialized,  
240 discrete sites (53). We hypothesized that because animals that were trained by PA14-derived odor did not  
241 induce *hsp70* gene expression unless they encountered PA14 lawns, olfactory signaling may be pre-  
242 emptively facilitating the association of HSF-1 with the transcriptional machinery needed to support  
243 transcription if the actual encounter with the threat were to occur. We therefore investigated whether the  
244 location of the HSF-1 nuclear bodies corresponded to known sites enriched in transcriptional activity. In  
245 *C. elegans*, the *hsp-16.2* promoter has been shown to localize to the nuclear pore complex (NPC)  
246 following heat shock (53, 54). However, although the HSF-1 nuclear bodies were occasionally in the  
247 vicinity of NPCs in germline nuclei, they did not co-localize with NPCs under any conditions (Figs. 6A-  
248 C; N = 4-6 animals and 145-180 nuclei per condition). On the other hand, over half of the HSF-1 nuclear  
249 bodies (0.2 of the 0.3 nuclear bodies per nucleus, N = 12 animals and 813 nuclei) that were induced by  
250 olfactory exposure to 2AA odor co-localized with total RNA polymerase II (Pol II) (Figs. 6D-F). The  
251 number of HSF-1 nuclear bodies that co-localized with Pol II remained the same even when HSF-1 was  
252 actively involved in Pol II-dependent transcription of *hsp* genes such as upon heat shock, or when animals  
253 were exposed to PA14 lawns (Figs. 6D-F). In comparison, only 0.11 of the rare HSF-1 nuclear bodies  
254 (0.15 nuclear bodies per nucleus; N = 10 animals and 678 nuclei) visible in control animals co-localized  
255 with Pol II (Figs. 6D-F). Consistent with previous reports (45, 55-57), Pol II appeared to cluster in  
256 discrete nuclear regions even prior to 2AA exposure or heat shock (Figs. 6D-F). The formation of HSF-1  
257 nuclear bodies, however, did not appear to require Pol II: RNAi-induced knockdown of the large subunit  
258 of RNA polymerase II (*ama-1*) substantially decreased the amounts of Pol II protein in oocyte nuclei  
259 (Fig. S6A) but did not interfere with the heat-shock induced formation of HSF-1 nuclear bodies in

260 oocytes (Fig. S6B). We conclude from these studies that olfactory training with PA14 odorants was  
261 priming HSF-1 by pre-emptively concentrating it at nuclear loci in close proximity to RNA polymerase II.  
262 Although we do not yet understand the nature of these nuclear foci where HSF-1 and Pol II were  
263 concentrated, or the intracellular mechanisms by which this occurred, taken together, these data suggest  
264 that the ability of the serotonin-based learning circuitry to induce the co-localization of HSF-1 with Pol II  
265 in nuclei throughout the animal, in anticipation of an impending encounter with PA14 could result in an  
266 enhanced transcriptional response upon actual exposure to the pathogen (45, 46, 54-57).

267

### 268 **HSF-1 is required for the learned avoidance behavior of *C. elegans* towards PA14.**

269 Not only was HSF-1 activity enhanced by aversive olfactory stimuli, HSF-1 appeared to be required for  
270 the behavioral avoidance of PA14. Decreasing the amounts of *hsf-1* mRNA and protein (Fig. S4A) ,  
271 abrogated the behavioral plasticity observed upon exposure to PA14 and animals deficient for *hsf-1*  
272 remained equally distributed between the PA14 and OP50 lawns displaying a marked deficiency in their  
273 avoidance of PA14 (Figs. 7A, S7A). Loss of *hsf-1* slightly retards motility, causing a delay of ~102  
274 seconds for *hsf-1* RNAi treated animals to traverse the 1 inch distance between the PA14 and OP50 lawns  
275 when compared to wild-type animals (Fig. S7B). However, this slight decrease in motility rates could not  
276 account for the lack of avoidance behavior of *hsf-1* RNAi treated animals, as they did not avoid PA14  
277 even by 4 hours after being given the choice between PA14 and OP50. By this time, all wild-type animals  
278 raised on control RNAi, whether trained on PA14 or control-RNAi odors, had left the PA14 lawns (Fig.  
279 7A). It therefore appeared that 5-HT signaling was integrating olfactory information and HSF-1  
280 activation to flag a sensory stimulus as a threat, providing a basis for the coupling of the enhanced  
281 behavioral aversion with the enhanced transcriptional response seen in our experiments. To test if this  
282 was the case we activated 5-HT release using optogenetic methods while co-incidentally exposing  
283 animals to the odor of the attractive *E. coli* HT115 (Fig. S7C). We predicted that although HT115 does  
284 not activate HSF-1 or evoke an avoidance response on its own, optogenetically activating serotonergic  
285 neurons so as to activate HSF-1 (7, 58) in the presence of HT115 odor, may change the valence of HT115

286 from that of attraction to one of aversion, and animals would now avoid HT115. This was the case (Figs.  
287 7B, C). The optogenetic activation of 5-HT release in the presence of HT115 odorant elicited a transient  
288 aversive response of animals from HT115, and this aversion lasted for as long as 45 minutes following  
289 stimulation when animals were given a choice between HT115 and PA14. Control animals that were  
290 mock stimulated by light did not change their behavior and, as expected, were attracted to HT115 and  
291 repelled by PA14 (Figs. 7B, C). Thus, inducing 5-HT release during an olfactory stimulus appeared to be  
292 sufficient to associate olfactory information regarding odor with HSF-1 activation to trigger an aversive  
293 response of *C. elegans* to danger.

294

## 295 **Discussion**

296 In summary, our data provide a mechanism whereby 5-HT-dependent learning and HSF-1 activation are  
297 coupled to elicit behavioral avoidance and transcription of cytoprotective chaperone genes under threat,  
298 enhancing the survival of the animal (Fig. 7D). Our data suggest that 5-HT release from neurons needs to  
299 be reinforced by HSF-1 activation throughout the animal to interpret a signal as aversive. Conversely,  
300 HSF-1 itself is activated by 5-HT release in a multi-step process. In our experiments we show this in  
301 some detail, in response to the odorants of the toxic bacteria *Pseudomonas*. However, similar responses  
302 could underlie the reaction of *C. elegans* to other stressors. The neuroethological significance of the  
303 response of *C. elegans* to 2AA seen in our studies is unknown. Our data suggest that 2AA acts as a  
304 kairomone (59)- an interspecies chemical messenger whose adaptive benefit appears to be greater for the  
305 recipient than the emitter. *C. elegans* is a bacterivore and relies, like its related parasitic nematode  
306 species, on chemical cues to interpret the hostility or hospitality of its environment. However, because  
307 2AA in itself does not elicit an aversive response suggesting that it is less like a predator odor or danger  
308 pheromone, we speculate that it is akin to what a loud noise may signify to a human- a reason for  
309 investigation, to be coupled with an avoidance response if confirmed to be associated with danger. 2AA  
310 is also secreted by other known pathogens of *C. elegans* such as *Burkholderia sp.* and arthropods (60-62),

311 perhaps accounting for the ability of *C. elegans* to detect it and to effectively modulate its behavior and  
312 stress responsiveness.

313

314 Our data also suggest that neuronal control over HSF-1-dependent transcription of chaperone genes  
315 within the metazoan *C. elegans* is at least a two-step process. The first step, the reversible and  
316 anticipatory change in nuclear localization of HSF-1, mediated by neurons and 5-HT, pre-emptively  
317 promotes HSF-1 concentration at nuclear regions close to RNA polymerase II, and could conceivably  
318 prepare the chromatin and transcriptional machinery for transcription, were the stressor to materialize.  
319 This could allow animals to enhance chaperone gene expression upon encounter with the actual stressor  
320 (45, 46, 54-57) (Fig. 7D). Nevertheless, a subsequent, as yet unknown signal ‘confirming’ the threat, also  
321 likely dependent on 5-HT, appears to be required for the actual transcription of *hsp* genes (Fig. 7D). This  
322 signal confers the specificity of the transcriptional response to the stressor. The exact mechanism by  
323 which 5-HT dependent learning induces HSF-1 to organize into nuclear bodies, and the nature of these  
324 structures and the genomic regions in the vicinity (63, 64) remain to be investigated. In *Drosophila* and  
325 mammalian cells, a fraction of RNA polymerase II is held paused at *hsp* loci until HSF-1 binding initiates  
326 transcription and the release of Pol II into the gene body (45, 47, 56, 65, 66). However, consistent with  
327 our data, in these cells too HSF-1 binding alone is not the determining event for the release of Pol II  
328 pausing, as HSF-1 can bind *hsp70* loci without inducing transcription (67).

329

330 The multistep activation of a fundamental cytoprotective response to a threat raises intriguing questions.  
331 Given its extraordinarily beneficial roles in conferring stress-resistance, why not simply activate HSF-1 in  
332 anticipation, even upon the slightest hint of stress? We believe that the answer to this may lie in findings  
333 that high levels of chaperone expression disrupt basic functions of a cell such as growth, division and  
334 secretory functions, and increase susceptibility to transformation (68-70). In fact, it has been shown that  
335 chaperone levels within cells of a multicellular organism are not maintained in excess (71). We  
336 hypothesize, therefore that for cells integrated into a metazoan, activation of HSF-1 needs to be tightly

337 controlled to occur only upon confirmation of danger, so as to prevent the possible disruption of tissue  
338 homeostasis. Organisms survive a range of environmental fluctuations and have evolved to colonize a  
339 vast diversity of environmental niches despite the sensitivity of protein-based biological processes to  
340 environmental perturbations. We believe that our data begin to address one mechanism through which  
341 such adaptation could occur.



342 **Materials and Methods**

343 **C. elegans Strains**

344 The following *C. elegans* strains were used. Generation of the AM1061 transgenic strain is described in  
345 Tatum *et al*, 2015(7). The remaining strains were obtained from the Caenorhabditis Genetics Center (CGC).

|            |                                                                                                               |
|------------|---------------------------------------------------------------------------------------------------------------|
| Bristol N2 | Wild type                                                                                                     |
| MT15434    | <i>tph-1 (mg280)II</i>                                                                                        |
| AM1061     | <i>unc-119(ed9)III,rmSi1[hsf-1p(4kb)::hsf-1(minigene)::gfp::3'UTR(hsf-1)+Cbrunc-119(+)] II; hsf-1(ok600)I</i> |
| AQ2050     | <i>lite-1(ce314); lJIs102 [tph-1;;ChR2::YFP;unc-122::gfp]</i>                                                 |

346

347 **Growth conditions of *C. elegans* and bacteria**

348 All strains were grown and maintained at 20°C. Ambient temperature was maintained at 20-22°C, and  
349 carefully monitored throughout the experimental procedures. All animals included in the experiments,  
350 unless stated otherwise, were one day old hermaphrodites that were staged as L4 animals 24-26 hours prior  
351 to the start of the experiment. Worms were grown and maintained at low densities, under standard  
352 conditions in standard incubators (20°C), as previously described (7). Specifically, animals were fed with  
353 OP50 obtained from the Caenorhabditis Genetics Center (CGC, Twin Cities, MN) that were seeded 2 days  
354 prior to use, and stock strains were maintained at low densities by passaging 8 or 10 L4s onto NGM plates,  
355 and 4 days later picking L4 animals onto fresh plates for experiments. The NGM plates were standardized  
356 by pouring 8.9ml liquid NGM per plate that yielded plates with an average weight of 13.5 ± 0.2 g. Any  
357 plates that varied from these measurements were discarded. The *Pseudomonas aeruginosa* strain PA14 was  
358 obtained from the Yahr Lab (University of Iowa) and the *Serratia marcescens* strain DB11 was obtained  
359 from the CGC. Both PA14 and DB11 lawns were kept at 25°C for two days prior to use in experiments.

360

361 **RNA Interference (RNAi) methods and Verification of RNAi-induced knock-down**

362 RNAi experiments were conducted using the standard feeding RNAi method (72-74). Bacterial clones  
363 expressing the control (empty vector) construct and the ds RNA targeting the majority of *C. elegans* genes  
364 were obtained from the Arhinger RNAi library (72) now available through Source Bioscience  
365 ([http://www.us.lifesciences.sourcebioscience.com/clone-products/non-mammalian/c-elegans/c-elegans-  
366 orf-rnai-library-v11/](http://www.us.lifesciences.sourcebioscience.com/clone-products/non-mammalian/c-elegans/c-elegans-orf-rnai-library-v11/)). The RNAi clones used in experiments were sequenced for verification prior to use.  
367 The pL4440 empty vector was used as control RNAi. RNAi induced knockdown was conducted by either  
368 feeding animals for 24 hours (*ama-1*) or for over one generation, where 2<sup>nd</sup> generation animals were born  
369 and raised on RNAi bacterial lawns (*hsf-1*). RNAi-mediated knockdown was confirmed by scoring for  
370 known, knock-phenotypes of the animals subject to RNAi that have been reported in genome-wide RNAi  
371 screens in *C. elegans* (slow and arrested larval growth as well as larval arrest at 27°C for *hsf-1* RNAi, and  
372 2<sup>nd</sup> generation embryonic lethality in the case of the *ama-1* RNAi). Knock-down was further ascertained  
373 using either western blots (HSF-1) or immunofluorescence (AMA-1) to verify a decrease in protein levels.

374

### 375 **Olfactory pre-exposure**

376 Bacterial cultures were grown in LB broth to OD600 values of between 1.4-1.7, and the variation between  
377 cultures within an experiment was kept to  $\pm 0.1$ . For pre-exposure to bacterial odors, experiments were  
378 carried out in a 25°C incubator, and 750ul of culture was placed in the lid of a 35x10mm petri dish (VWR  
379 International, Catalog # 10799-192; Radnor, PA), which was then placed in the lid of an inverted standard  
380 NGM petri dish (see image below). As the plates were inverted, animals crawled on OP50 lawns on the  
381 ‘top’ of the plates, while the odorant remained on the ‘bottom’, undisturbed, and so, at no point, did animals  
382 come in contact with the odorant. L4 animals were picked onto these NGM plates on OP50 lawns on the  
383 previous day, and remained on their respective OP50 lawns during the course of the exposure to odor. We  
384 verified that no bacterial spores were transferred via this exposure by conducting the same procedure with  
385 an unseeded NGM plate, and observing the plates over the course of the next two days for bacterial growth.  
386 For “naïve” conditions, the animals were not given any odor prior to the start of the experiments. When the  
387 pre-exposure was to water or 2AA (Catalog no. A38207; Sigma-Aldrich, St. Louis, MO), 3 mls of water

388 or 1mM 2AA (kept at 37°C for 5 minutes prior to use) was used in place of the bacterial culture, and  
389 experiments were carried out at room temperature, ranging from 20-22°C. When the pre-exposure was to  
390 ethanol or N-(3-Oxododecanoyl)-L-homoserine (3OC12; Catalog no. O9139; Sigma-Aldrich, St. Louis,  
391 MO), 3 mls of 0.2% ethanol or 10µM 3OC12 was used and experiments were carried out at room  
392 temperature. For experiments with a recovery condition, after the 30 minutes of olfaction, the plate  
393 containing the liquid odorant was removed and animals were allowed to “recover” at room temperature for  
394 30 minutes prior to harvesting for subsequent experiments.

395

396

397

398

399

400

401

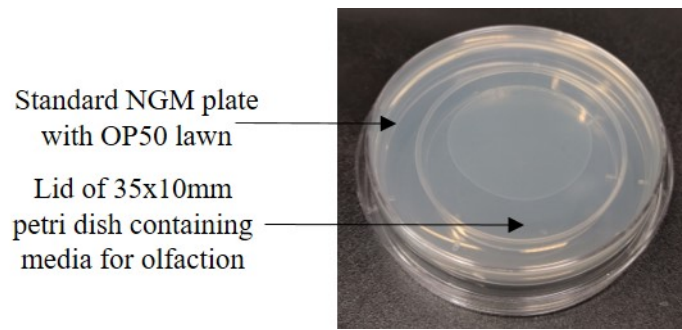

#### 402 **Bacterial lawn choice assays**

403 L4s were harvested 24-26 hours prior to the start of the behavioral choice experiments. Choice plates were  
404 seeded and grown at 25°C for two days before use. For PA14 lawns the duration of growth on the NGM  
405 plates prior to the behavioral assay was particularly important. Younger lawns elicited later avoidance  
406 behaviors. 85ul of bacterial culture (OP50, PA14, HT115 or DB11) grown to OD600 values of between  
407 1.3-1.6 was used for seeding each lawn. The distance between the lawns was 1 inch (see cartoon below).  
408 Following olfactory training (conducted as described above), 30 day one adult animals were transferred to  
409 the middle of the choice plates, at a point equidistant from the middle of each lawn and the behavior of the  
410 animals was observed at said frequencies for the next 4 hours at room temperature. The number of animals  
411 present on either bacterial lawns or off bacterial lawns was recorded, and the experimental bacteria choice  
412 index was calculated using the following equation:

413 
$$\frac{(\# \text{ of animals on experimental bacteria}) - (\# \text{ of animals on control bacteria})}{\Sigma [(\# \text{ of animals on experimental bacteria}) + (\# \text{ of animals on control bacteria})]}$$

414 Animals were considered to be on a lawn as long as they were physically in the lawn be it on the edge or  
415 in the middle of the lawn at the time of observation at a maximum of 4.0x magnification.

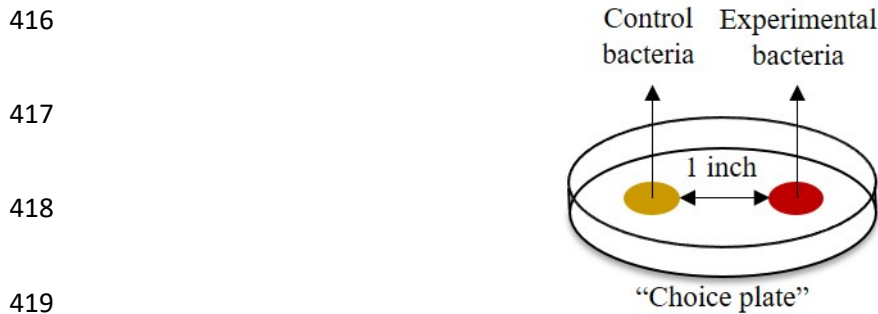

420

#### 421 Chemotaxis assays

422 Chemotaxis between water and 10mM 2AA were carried out at room temperature. 5ul each of water and  
423 2AA (pre-mixed with 0.5M sodium azide - Catalog no. S2002; Sigma-Aldrich, St. Louis, MO – such that  
424 the final concentration of 2AA was 10mM and that of sodium azide was 0.25M) were dropped onto an  
425 unseeded NGM plate. The two spots were 1.5 inches apart from each other. The spots were air-dried for 5  
426 minutes, and then the chemotaxis assay was carried out by placing 30 day one worms (harvested as L4s the  
427 day before) at a point on the plate equidistant from the two spots. Worms were counted as having made  
428 their choice only if they were immobilized at the time points at which observations were made. Choice  
429 Index for PA14 was calculated as:

430 
$$\frac{(\# \text{ of animals on 2AA}) - (\# \text{ of animals on water})}{\Sigma [(\# \text{ of animals on 2AA}) + (\# \text{ of animals on water})]}$$

431

#### 432 Exogenous serotonin (5-HT) treatment

433 Exogenous serotonin treatment was modified from Jafari *et al*, 2011. A serotonin solution (Catalog no.  
434 85036; Sigma-Aldrich, St. Louis, MO) in sterile water was dropped onto the surface of OP50 bacterial  
435 lawns (such that the lawns were fully covered in serotonin) on NGM plates and dried for ~2 hours at room

436 temperature prior to use. For confirmation of serotonin uptake using immunofluorescence, serotonin  
437 concentrations between 2-20mM were used and day one animals were placed onto serotonin-treated plates  
438 for between 30 minutes to 2 hours. For the exogenous serotonin choice assays, a 2mM serotonin solution  
439 was used and L4s were then picked onto these plates and kept at 20°C for 24-26 hours prior to experimenting  
440 with these day one adults the next day. Olfactory pre-exposure was carried out using OP50 and PA14  
441 bacterial cultures as described above, followed by choice assays as described above.

442

#### 443 **PA14 Survival Assays**

444 Survival assays were carried out on day one adult worms that had been harvested as L4s the previous day  
445 (50 worms per plate). PA14 killing was performed in liquid bacterial culture in 6-well dishes(75). OP50  
446 liquid bacterial culture used as a control. Both PA14 and OP50 bacteria were grown to an OD600 range of  
447 0.8 – 1.0. Olfactory pre-exposure was performed as described above using OP50 and PA14, and  
448 immediately after olfaction, worms were picked into liquid bacterial culture in the 6-well dishes. Plates  
449 were covered loosely to allow for air circulation and kept in a 25°C incubator set to 85rpm, and scored  
450 periodically for survival by visualization under a microscope. Animals were scored as dead if they were not  
451 moving in response to gentle swirling of the media and if there was no pharyngeal pumping. At the end of  
452 the experiment, death was confirmed by pipetting the animals onto unseeded plates and lack of revival.

453

#### 454 **Longevity Assays**

455 Each experiment was carried out on 50 day one adults harvested as L4s the prior day. For longevity with  
456 olfaction, animals were pre-exposed to water and 2AA as described above, and then transferred onto a new  
457 OP50-seeded NGM plate. Animals were transferred every two days to avoid starvation, until the point  
458 where they were no longer capable of reproduction, typically at day 9. The 2AA liquid, and water, were  
459 refreshed on a daily basis. For longevity with ingestion, water and 1mM 2AA was dropped onto OP50  
460 lawns on NGM plates and allowed to dry for 2 hours prior to use. Animals were transferred every two days  
461 until day 9, and the water and 2AA-treated plates were made fresh on the day of use. Animals were scored

462 as dead if they were not moving in response to tapping of the plate, or a gentle touch on the NGM adjacent  
463 to the animal. Animals that died of internal hatching were discarded.

464

#### 465 **Thermotolerance Assays**

466 These assays were carried out on day one adult worms that had been harvested as L4s the previous day,  
467 with 20 worms per plate. Olfactory pre-exposure was performed as described above, and immediately after  
468 olfaction, worms were subjected to an extended heat treatment (45 minutes) in a circulating water bath pre-  
469 heated to 37.5°C. After this heat exposure the animals were allowed to recover for 16 hours at 20°C and  
470 were then scored as live or dead the following day. The lack of pharyngeal pumping and lack response to  
471 gentle and harsh touch were the criteria used for scoring an animal as dead.

472

#### 473 **RNA extraction and quantitative RT-PCR**

474 Samples for RNA were day one adult worms that had been harvested as L4s the previous day, with 30  
475 worms per plate. Olfactory pre-exposure was performed as described above, and animals were either  
476 immediately harvested (olfaction only) or subjected to a PA14 lawn for 10 minutes (olfaction + lawn) and  
477 then harvested. RNA extraction was conducted according to previously published methods (6, 7). RNA  
478 samples were harvested in 50µl of Trizol (Catalog no. 400753; Life Technologies, Carlsbad, CA) and snap-  
479 frozen immediately in liquid nitrogen. The following steps were either carried out immediately after snap-  
480 freezing or samples were stored at -80°C. Samples were thawed on ice and 200µl of Trizol was added,  
481 followed by brief vortexing at room temperature. Samples were then vortexed at 4°C for at least 45 minutes  
482 to lyse worms completely. RNA was then purified as detailed in the manufacturer's protocol with  
483 appropriate volumes of reagents modified to 250µl Trizol. RNA pellet was dissolved in 17µl RNase-free  
484 water. RNA was treated with DNase using TURBO DNA-free kit (Catalog no. AM1907; Life Technologies,  
485 Carlsbad, CA) as per manufacturer's protocol. cDNA was generated by using the iScript™ cDNA  
486 Synthesis Kit (Catalog no. 170-8891; Bio-Rad, Hercules, CA). Real-time PCR was performed using  
487 LightCycler® 480 SYBR Green I Master Mix (Catalog no. 04887352001; Roche, Basel, Switzerland), in

488 LightCycler® 480 (Roche, Basel, Switzerland) at a 10µl sample volume, in a 96 well white plate (Catalog  
489 no. 04729692001; Roche, Basel, Switzerland). The relative amounts of *hsp* mRNA were determined using  
490 the “Delta Delta CT” (ddCT) Method for quantitation. *act-1*, *syp-1* and/or *pmp-3* mRNA was used as  
491 internal controls. The use of *syp-1*, which is a germline expressed gene controlled for the variable numbers  
492 of embryos that were in the animals when they were prepared for mRNA extraction. All relative changes  
493 of *hsp* mRNA were normalized to either that of the wild type control, or the control for each genotype  
494 (specified in figure legends). CT values were obtained in triplicate for each sample (technical triplicates).  
495 Each experiment was then repeated a minimum of three times. For qPCR reactions, the amplification of a  
496 single product with no primer dimers was confirmed by melt-curve analysis performed at the end of the  
497 reaction. No reverse transcriptase (no-RT) controls were included to exclude any possible genomic DNA  
498 amplification. Primers were designed using Roche’s Universal ProbeLibrary Assay Design Center software  
499 and generated by Integrated DNA Technologies (Coralville, IA). The primers used for the PCR analysis  
500 were:

|                                        |                                       |
|----------------------------------------|---------------------------------------|
| <i>hsp70</i> (F44E5.4/F44E5.5) Forward | 5’-TGC ACC AAT CTG GAC AAT CT-3’      |
| <i>hsp70</i> (F44E5.4/F44E5.5) Reverse | 5’-TCC AGC AGT TCC AGG ATT TC-3’      |
| <i>Actin</i> Forward                   | 5’-ATC ACC GCT CTT GCC CCA TC-3’      |
| <i>Actin</i> Reverse                   | 5’-GGC CGG ACT CGT CGT ATT CTT G-3’   |
| <i>syp-1</i> Forward                   | 5’-GAT GAA ATG ATA ATT CGC CAA GA-3’  |
| <i>syp-1</i> Reverse                   | 5’- ACG CAA TCT TCC CTC ATT TG-3’     |
| <i>pmp-3</i> Forward                   | 5’-TAG AGT CAA GGG TCG CAG TG-3’      |
| <i>pmp-3</i> Reverse                   | 5’-ATC GGC ACC AAG GAA ACT GG-3’      |
| <i>hsp-16.2</i> (Y46H3A.3) Forward     | 5’-CGT TCC GTT TTT GGT GAT CT-3’      |
| <i>hsp-16.2</i> (Y46H3A.3) Reverse     | 5’-ACC TCA GAA GAC TCA GAT GGA GA-3’  |
| <i>hsp-16.41</i> (Y46H3A.2) Forward    | 5’-AAT TTT TCC GAT AAT ATT GGG GAG-3’ |
| <i>hsp-16.41</i> (Y46H3A.2) Reverse    | 5’-TTC TGG TTT GAA ATG AGA GAC ATC-3’ |

501

502 **Single molecule fluorescent in situ hybridization (smFISH)**

503 smFISH probes were designed against F44E5.4/5 by utilizing the Stellaris FISH Probe Designer (Biosearch  
504 Technologies, Inc., Petaluma, CA) available online at [www.biosearchtech.com/stellarisdesigner](http://www.biosearchtech.com/stellarisdesigner). The fixed  
505 worms were hybridized with the F44E5.4/5 Stellaris FISH Probe set labeled with Cy5 dye (Biosearch  
506 Technologies, Inc., Petaluma, CA), following the manufacturer's instructions available online at  
507 [www.biosearchtech.com/stellarisprotocols](http://www.biosearchtech.com/stellarisprotocols). 10-20 day one adult wild-type or *tph-1(mg280)II* worms per  
508 condition (30' OP50 olfaction, 30' PA14 olfaction, 30' OP50 olfaction + 10' PA14 lawn, 30' PA14  
509 olfaction + 10' PA14 lawn) were harvested, washed once in 1X RNase-free PBS (Ambion, Catalog #  
510 AM9624), fixed in 4% paraformaldehyde and subsequently washed in 70% ethanol at 4°C for  
511 approximately 24 hours to permeabilize the animals. Samples were washed using Stellaris Wash Buffer A  
512 (Catalog # SMF-WA1-60, Biosearch Technologies, Inc., Petaluma, CA) and then the hybridization solution  
513 (Catalog # SMF-HB1-10, Biosearch Technologies, Inc., Petaluma, CA) containing the probes was added.  
514 The samples were hybridized at 37 °C for 16 hours, after which they were washed three times with Wash  
515 Buffer A, then incubated for 30 minutes in Wash Buffer A with DAPI. Following DAPI staining, worms  
516 were washed with Wash Buffer B (Catalog # SMF-WB1-20, Biosearch Technologies, Inc., Petaluma, CA)  
517 and mounted on slides in approximately 12 µl of Vectashield mounting medium (Catalog # H-1000; Vector  
518 Laboratories, Burlingame, CA). Imaging of slides was performed using a Leica TCS SPE Confocal  
519 Microscope (Leica, Solms, Germany) using a 63x oil objective. LAS AF software (Leica, Solms, Germany)  
520 was used to obtain and view z-stacks and quantification was conducted visually by counting the number of  
521 F44E5.4/5 puncta present in nuclei in the head, intestine and germline of each individual worm.

522

523 **Western blot protein analysis**

524 For all western blot analyses animals were day one adults. Acute heat shock was performed by wrapping  
525 NGM plates with parafilm and sealing plates in a zippered plastic bag. Plates were submerged in a



526 circulating water bath set to 34°C for 10 minutes. For protein analysis, 30 day one adult worms were  
527 collected into 18 µl of 1X PBS (pH 7.4) and then 4X Laemmli sample buffer (Catalog #1610737, Bio-Rad,  
528 Hercules, CA) supplemented with 10% beta-mercaptoethanol was added to each sample before boiling for  
529 30 minutes. Whole worm lysates were resolved on 8% SDS-PAGE gels and transferred onto nitrocellulose  
530 membrane (Catalog # 1620115, Bio-Rad, Hercules, CA). Immunoblots were imaged using Li-Cor®  
531 Odyssey Infrared Imaging System (LI-COR Biotechnology, Lincoln, NE). Rabbit anti-HSF1 primary  
532 antibody (Sigma Catalog # HPA008888) was used to detect HSF-1 while the mouse anti-alpha tubulin  
533 primary antibody (AA4.3), developed by Walsh, C., was obtained from the Developmental Studies  
534 Hybridoma Bank, created by the NICHD of the NIH and maintained at The University of Iowa, Department  
535 of Biology, Iowa City, IA 52242. The following secondary antibodies were used: Sheep anti-Mouse IgG  
536 (H&L) Antibody IRDye800CW® Conjugated (Catalog # 610-631-002, Rockland antibodies & assays,  
537 Limerick, PA), Alexa Fluor 680 goat anti-rabbit IgG (H+L) (Catalog # A21109, Molecular Probes,  
538 Invitrogen, Carlsbad, CA). The Li-Cor Image Studio software was used to quantify protein levels in  
539 different samples, relative to alpha-tubulin levels. Subsequent analysis of protein levels was calculated  
540 relative to wild-type controls. For Phos-tag PAGE analysis, Phos-tag reagent was obtained from Wako  
541 Pure Chemicals Industries Ltd (Japan) and the protocol was provided here [http://www.wako-](http://www.wako-chem.co.jp/english/labchem/journals/phos-tag_GB2013/pdf/Phos-tag.pdf)  
542 [chem.co.jp/english/labchem/journals/phos-tag\\_GB2013/pdf/Phos-tag.pdf](http://www.wako-chem.co.jp/english/labchem/journals/phos-tag_GB2013/pdf/Phos-tag.pdf). Our experiments utilized 25µM  
543 final concentration of phos-tag reagent in a 6% SDS-PAGE gel. Full-length recombinant *C. elegans* HSF-  
544 1 protein was a kind gift of Dr. Richard Morimoto (Northwestern University, Chicago, IL). For EGS cross-  
545 linking experiments, whole worm lysate was prepared by washing worms off the plate in lysis buffer  
546 (10mM HEPES pH 7.4, 130mM NaCl, 5mM KCl, 1mM EDTA, 10% glycerol) supplemented with 1mM  
547 DTT, 0.2% NP-40 and protease inhibitor cocktail (ThermoFisher Catalog # 87785). Worms were lysed in  
548 a Precellys24 homogenizer (Bertin Corp., Rockville, MD) with VK05 beads (Bertin Corp., Rockville, MD)  
549 and cleared lysate was incubated at room temperature with 0, 0.1 or 0.5mM EGS (ThermoFisher Catalog #  
550 21565) for 30 minutes. 4X Laemmli sample buffer supplemented with 10% beta-mercaptoethanol was

551 added and sample were boiled briefly for 5 minutes to quench reactions. Samples were then resolved on a  
552 6% SDS-PAGE gel and Western blot analysis for HSF-1 was carried out as described above.

553

#### 554 **Whole Worm/Gonad Dissections Immunofluorescent staining**

555 Anti-serotonin and anti-HSF1 staining was performed following the protocol developed by the Loer Lab  
556 (<http://home.sandiego.edu/~cloer/loerlab/anti5htshort.html>) and modifications were described in full in

557 Tatum *et al*, 2015 (7). Briefly, worms were picked into 500ul of 1X PBS (pH 7.4) and spun down quickly  
558 then fixed in 4% paraformaldehyde (Catalog no. 15710; Electron Microscopy Sciences, Hatfield, PA) in  
559 1X PBS (pH 7.4) at 4°C for 18 hours. Worms were then incubated in beta-mercaptoethanol solution for 18  
560 hours, followed by cuticle digestion using collagenase type IV (Catalog no. C5138; Sigma, St. Louis, MO).

561 For serotonin staining, the primary antibody was 1:100 rabbit anti-serotonin as in Tatum *et al.*, 2015.

562 Primary antibody used was 1:100 rabbit anti-HSF1 antibody (Sigma) while the secondary antibody used  
563 was 1:100 donkey anti-rabbit Alexa647 (Life Technologies Catalog No: A-31573). For staining of nuclear  
564 pore complex proteins, we used 1:100 mouse anti-NPC (54) (Abcam, ab24609) and 1:100 rabbit anti-mouse

565 Alexa488 (Life Technologies Catalog No. A-11059). Worms were incubated with DAPI in 0.1% BSA/1X  
566 PBS for 30 minutes at room temperature then washed and mounted on slides in approximately 12 µl of  
567 Vectashield mounting medium (Catalog # H-1000; Vector Laboratories, Burlingame, CA). Imaging of

568 slides was performed using a Leica TCS SPE Confocal Microscope (Leica, Solms, Germany) using a 63x  
569 oil objective. LAS AF software (Leica, Solms, Germany) was used to obtain and view z-stacks. For gonad

570 dissections to stain for RNA Pol II, day one adult AM1061 worms were picked into 15ul of 1X PBS (pH  
571 7.4) on a cover slip, and quickly dissected with a blade (Integra Miltex Product # 4-311, York, PA). A

572 charged slide (Superfrost Plus, Fisher Scientific Catalog # 12-550-15, Pittsburgh, PA) was then placed over  
573 the cover slip and immediately placed on a pre-chilled freezing block on dry ice for at least 5 minutes. The

574 cover slip was quickly removed and the slides were fixed in 100% methanol (-20°C) for 1 minute then fixed  
575 in 4% paraformaldehyde, 1X PBS (pH 7.4), 80mM HEPES (pH 7.4), 1.6mM MgSO<sub>4</sub> and 0.8mM EDTA

576 for 30 minutes. After rinsing in 1X PBST, slides were blocked for one hour in 1X PBST with 1% BSA and

577 then incubated overnight in 1:500 mouse anti-Pol II (Biolegend, # MMS-126R clone 8w16g(76)). The next  
578 day, slides were washed and then incubated for 2 hours in 1:1000 donkey anti-mouse Cy3 (Jackson  
579 ImmunoResearch Laboratories, Code # 715-165-150, West Grove, PA) before being washed and incubated  
580 in DAPI in 1X PBST, then mounted in 8ul Vectashield and imaged as described above. For quantification  
581 of nuclear bodies, the images were merged when co-staining was carried out (HSF-1 and NPC or HSF-  
582 1::GFP and Pol II) and discrete puncta ranging in size from approximately 400-550 nm were counted first  
583 in the HSF-1 channel. We then determined whether these HSF-1 puncta co-localized with the puncta in the  
584 other channel. When HSF-1 immunostaining alone was carried out, only the HSF-1 channel was used to  
585 quantify nuclear bodies.

586

#### 587 **Optogenetic activation of serotonergic neurons (olfaction + choice assay)**

588 To make experimental all-*trans* retinal (+ATR) plates, a 100mM ATR (product no. R2500; Sigma, St. Louis,  
589 MO) stock dissolved in 100% EtOH was diluted to a final concentration of 0.4 mM into OP50 and 250µl  
590 was seeded onto a fresh NGM plate. Control (-ATR) plates for experiments were seeded at the same time  
591 with the same OP50 culture, but without ATR. Plates were kept in dark and allowed to dry for a minimum  
592 of 10 hours prior to use. Plates were never used later than 1 day after they were seeded with ATR. The *C.*  
593 *elegans* strain used in this experiment was AQ2050 (*ijIs102; lite-1(ce314)*). L4s were harvested onto +ATR  
594 and -ATR plates, and the experiment was carried out on day one adult worms that were transferred in sets  
595 of 10 worms per plate onto plates containing 5ul of either +ATR or -ATR OP50 lawns. All plates were  
596 kept in the dark and animals were allowed to acclimatize to room temperature (20-22°C) for at least 30  
597 minutes prior to the start of the optogenetic activation.

598

599 For the olfaction, HT115 and PA14 bacterial cultures were grown to an OD600 range of 1.4-1.7, and five  
600 10ul drops of culture (either HT115 or PA14) were placed around the small bacterial lawn. The animals  
601 were then immediately illuminated with blue light for 5 minutes at a 6.3x magnification using a MZ10 F  
602 microscope (Leica, Solms, Germany) connected to a EL6000 light source (Leica, Solms, Germany), and

603 subsequently transferred onto choice plates containing HT115 and PA14 lawns. –ATR animals were treated  
604 similarly. During the process of olfaction and optogenetic activation, animals that moved away from the  
605 central lawn were not used for the subsequent choice assay.

606

#### 607 **Scoring germline nuclei for HSF-1::GFP activation post-olfaction**

608 Olfaction was carried out as described above (“Olfactory pre-exposure/training”), using water and 2AA.  
609 The *C. elegans* strain used was AM1061 (*rmSi1 II; hsf-1(ok600) I*). Whole worm live imaging was carried  
610 out using a Zeiss Observer A1 inverted microscope and animals were immobilized in 25mM levamisole on  
611 2% agarose pads with cover slips. Nuclei were scored for induction within 10 minutes of the end of olfaction.  
612 Induction was assessed based on the presence or absence of HSF-1::GFP stress-induced nuclear puncta in  
613 the nuclei of germ-cells located in the two gonads of *C. elegans*. Analysis of the HSF1::GFP puncta was  
614 carried out by counting the number of nuclei showing distinct puncta compared to the total number of nuclei  
615 present in a single focal plane. Images also included animals put on OP50 (control) or PA14 for 30 minutes  
616 on PA14 at 20°C.

617

#### 618 **Statistical Analysis and N values**

619 For qRT-PCR data expressed as fold change in mRNA levels relative to control, a linear mixed model  
620 analysis for a randomized block design was used to compare the different conditions in each experimental  
621 data set. This was done to account for variation between different biological replicates, where treatment  
622 response was compared within the experiment. The data for this analysis was the response measure  
623 expressed as a ratio of control (for example, OP50 or H<sub>2</sub>O odor only). Since the distribution of ratios was  
624 usually not normally distributed, the natural log transformation was applied to the data to normalize the  
625 data distribution, with the log transformed values used in the analysis. Means in the log scale were then  
626 back-transformed to obtain geometric mean estimates in the original scale. The statistical analysis was  
627 performed using MIXED procedure in SAS (version 9.4). For all other data sets and where described  
628 (choice assays, smFISH/immunofluorescence/fluorescence quantification, Western blot quantification,

629 ChIP-qPCR analysis), the parametric Student's t-test (paired) was conducted to test for significance. For  
630 longevity/survival assays, OASIS software available online (<https://sbi.postech.ac.kr/oasis2/surv/>) was  
631 used to calculate mean lifespan, and the log-rank test was used to calculate statistical significance between  
632 the different conditions.

633

634 For all data quantified and analyzed, N values represent at least 3 independent repeats conducted to generate  
635 the number in each of the represented data points. For data that do not require quantification, the  
636 experiments were also conducted 3 or >3 times, and the data shown are representative data. N values for  
637 choice assays are the numbers of independent repeats of the Choice Assay. N values for qRT-PCR data are  
638 the number of repeats of the mRNA measurements per sample. When assays are conducted to compare the  
639 difference between different genotypes, only the number of paired repeats are considered to generate the N  
640 value. The N value in smFISH data, or data regarding HSF-1 nuclear bodies, is numbers of nuclei counted  
641 per animal (/field of observation) per genotype per treatment condition obtained from 2-3 independent  
642 repeats of the experiment. Only N of paired experiments are used when genotypes are compared.

643

#### 644 **Chromatin Immunoprecipitation (ChIP)**

645 Preparation of samples for ChIP were performed by modifying the protocols previously described (50, 77).  
646 100 wild type day one adult animals per condition were collected from NGM plates, washed with 1X PBS  
647 (pH 7.4) and cross-linked with 2% formaldehyde at room temperature for 10 minutes. Reactions were  
648 quenched with 250mM Tris (pH 7.4) at room temperature for 10 minutes, and then washed 3 times in 1X  
649 PBS with protease inhibitor cocktail and snap-frozen in liquid nitrogen. The worm pellet was resuspended  
650 in FA buffer (50mM HEPES pH 7.4, 150mM NaCl, 1mM EDTA, 1% Triton X-100, 0.1% sodium  
651 deoxycholate) supplemented with protease inhibitor cocktail and lysed using a Precellys24 homogenizer  
652 (Bertin Corp., Rockville, MD), then sonicated in a Vibra-Cell processor (Sonics & Materials Inc., Newtown,  
653 CT). Pre-cleared lysate was then incubated overnight with 5ul of Rabbit anti-HSF-1 antibody (Sigma) and  
654 immunoprecipitation was performed with Protein A/G magnetic beads (Pierce, Catalog # 88802). qPCR

655 analysis of DNA was performed using the reagents described above and the primer sets *syp-1* and *hsp-70*  
656 (F44E5.4) were used to respectively quantify non-specific and specific binding of gene promoters to HSF-  
657 1. The amplified qPCR products were run on agarose gels to verify that ChIP had resulted in the  
658 amplification of the appropriate sized band. PCR amplification of F44E5.4 was also carried out to visualize  
659 amplification of the appropriate product in an agarose gel.

|                                                        |                                   |
|--------------------------------------------------------|-----------------------------------|
| <i>hsp70</i> (F44E5.4/F44E5.5) Forward                 | 5'-TGC ACC AAT CTG GAC AAT CT-3'  |
| <i>hsp70</i> (F44E5.4/F44E5.5) Reverse                 | 5'-TCC AGC AGT TCC AGG ATT TC-3'  |
| <i>syp-1</i> Forward                                   | 5'-ACA CCA CTT ACC GCA GCT AC-3'  |
| <i>syp-1</i> Reverse                                   | 5'-CTT CCC TCC TCT CTT TCG GC-3'  |
| <i>hsp-70</i> (F44E5.4/F44E5.5)_PCR Forward            | 5'-TTG AGA TCC TCG CCA ACT CG-3'  |
| <i>hsp-70</i> (F44E5.4/F44E5.5)_PCR Reverse            | 5'-TGC ATC CTT TGT TGC TTG CC-3'  |
| <i>hsp-70</i> (F44E5.4/F44E5.5) promoter Set 1 Forward | 5'-ATA CTA CCC GAA TCC CAG CC-3'  |
| <i>hsp-70</i> (F44E5.4/F44E5.5) promoter Set 1 Reverse | 5'-GCA ACA GAG ACG CAG ATT GT-3'  |
| <i>hsp-70</i> (F44E5.4/F44E5.5) promoter Set 2 Forward | 5'-GTC GGC CGT CTC TTT CTC TT-3'  |
| <i>hsp-70</i> (F44E5.4/F44E5.5) promoter Set 2 Reverse | 5'-CCC GAA TCC CAG CCC TTT T-3'   |
| <i>hsp-70</i> (F44E5.4/F44E5.5) promoter Set 3 Forward | 5'-TAA AAG GGC TGG GAT TCG GG-3'  |
| <i>hsp-70</i> (F44E5.4/F44E5.5) promoter Set 3 Reverse | 5'-ACC GAG GTC GAT ACC AAT AGC-3' |

660

### 661 **Electrophoretic Mobility Shift Assay (EMSA)**

662 HSE probe sequences were obtained from Catarina-Silva *et al*, 2013(78) and IR700-labeled oligos were  
663 obtained from Integrated DNA Technologies (Coralville, IA). Worm lysate was prepared by washing  
664 worms off in 1x PBS (pH 7.4) and immediately snap-freezing in liquid nitrogen. Worm pellets were thawed  
665 on ice and lysed in a binding buffer (10mM HEPES pH 7.4, 130mM NaCl, 5mM KCl, 1mM EDTA, 0.2%  
666 NP-40, 10% glycerol) supplemented with protease inhibitor cocktail and 1mM DTT. Lysis was carried out  
667 using the Precellys24 homogenizer (Bertin Corp., Rockville, MD). EMSA binding reactions (lysate, poly

668 dI-dC and labeled IR700-HSE probes) were incubated at room temperature for 30 minutes, except for “heat  
669 shock” binding reactions, with or without competition using unlabeled probes, which were performed at  
670 35°C for 30 minutes. Samples were then run out on a 6% acrylamide gel in 0.5X TBE and imaged using  
671 Li-Cor® Odyssey Infrared Imaging System (LI-COR Biotechnology, Lincoln, NE) and quantified using  
672 Li-Cor® Image Studio software.

|                   |                                 |
|-------------------|---------------------------------|
| IR700 HSE-Forward | taaattgtagaaggttctagaagatgccaga |
| IR700 HSE-Reverse | tctggcatcttctagaaccttctacaattta |

673

674

### 675 **Motility Assays**

676 For motility assays, 2<sup>nd</sup> generation RNAi animals were used (refer to growth conditions described above).  
677 Animals were harvested as L4s the day prior to the experiment. Day one adults were singled onto a lawn  
678 of OP50 and a video of the animals’ movement was captured at 0.8x magnification using a Leica MZ120  
679 camera attached to an upright microscope (Leica KL1500) for approximately 30 seconds. Videos were  
680 analyzed using ImageJ software to measure the distance travelled by the animal and from this the velocity  
681 of the worm was calculated. The velocities were then used to calculate the time needed for each animal to  
682 travel 1 inch (the distance between bacterial lawns in the choice assay described above).

## 683 **Supplementary Materials**

684 Fig. S1. Design and specificity of olfactory pre-exposure and choice assay.

685 Fig S2. The compound 2-aminoacetophenone (2AA) made by PA14 specifically modulates olfactory  
686 avoidance behavior and protects against PA14-induced death.

687 Fig. S3. Serotonin is required for learning-mediated HSF-1 activation.

688 Fig. S4. Characterization of *C. elegans* HSF-1.

689 Fig. S5. Characterization of *C. elegans* HSF-1 following exposure to water ‘odor’ and 2AA odor.

690 Fig S6. The formation of HSF-1 nuclear bodies does not require RNA Polymerase II.

691 Fig. S7. HSF-1 is required for olfactory learning.

692 Table S1. Survival of animals on PA14 is dependent on HSF-1.

693 Table S2. Statistical analysis.

694 Table S3. 2AA does not appear to be toxic to *C. elegans*

695 Table S4. Pre-exposure to the odor of PA14 protects animals from subsequent exposure to PA14.

696

## 697 **References and Notes**

698 1. Anckar, J., and L. Sistonen. 2011. Regulation of HSF1 function in the heat stress response:  
699 implications in aging and disease. *Annu Rev Biochem* 80: 1089-1115.

700 2. Lindquist, S. 1986. The heat-shock response. *Annu Rev Biochem* 55: 1151-1191.

701 3. Liu, X. D., and D. J. Thiele. 1996. Oxidative stress induced heat shock factor phosphorylation and  
702 HSF-dependent activation of yeast metallothionein gene transcription. *Genes Dev* 10: 592-603.

703 4. Morimoto, R. I. 2008. Proteotoxic stress and inducible chaperone networks in  
704 neurodegenerative disease and aging. *Genes Dev* 22: 1427-1438.

705 5. Prahlad, V., T. Cornelius, and R. I. Morimoto. 2008. Regulation of the cellular heat shock  
706 response in *Caenorhabditis elegans* by thermosensory neurons. *Science (New York, N.Y)* 320:

707 811-814.



- 708 6. Prahlad, V., and R. I. Morimoto. 2011. Neuronal circuitry regulates the response of  
709 Caenorhabditis elegans to misfolded proteins. *Proc Natl Acad Sci U S A* 108: 14204-14209.
- 710 7. Tatum, M. C., F. K. Ooi, M. R. Chikka, L. Chauve, L. A. Martinez-Velazquez, H. W. Steinbusch, R. I.  
711 Morimoto, and V. Prahlad. 2015. Neuronal serotonin release triggers the heat shock response in  
712 C. elegans in the absence of temperature increase. *Curr Biol* 25: 163-174.
- 713 8. Kumsta, C., T. T. Ching, M. Nishimura, A. E. Davis, S. Gelino, H. H. Catan, X. Yu, C. C. Chu, B. Ong,  
714 S. H. Panowski, N. Baird, R. Bodmer, A. L. Hsu, and M. Hansen. 2014. Integrin-linked kinase  
715 modulates longevity and thermotolerance in C. elegans through neuronal control of HSF-1.  
716 *Aging Cell* 13: 419-430.
- 717 9. van Oosten-Hawle, P., R. S. Porter, and R. I. Morimoto. 2013. Regulation of organismal  
718 proteostasis by transcellular chaperone signaling. *Cell* 153: 1366-1378.
- 719 10. Wolff, S., J. S. Weissman, and A. Dillin. 2014. Differential scales of protein quality control. *Cell*  
720 157: 52-64.
- 721 11. Takeuchi, T., M. Suzuki, N. Fujikake, H. A. Popiel, H. Kikuchi, S. Futaki, K. Wada, and Y. Nagai.  
722 2015. Intercellular chaperone transmission via exosomes contributes to maintenance of protein  
723 homeostasis at the organismal level. *Proc Natl Acad Sci U S A* 112: E2497-2506.
- 724 12. Castellucci, V., H. Pinsker, I. Kupfermann, and E. R. Kandel. 1970. Neuronal mechanisms of  
725 habituation and dishabituation of the gill-withdrawal reflex in Aplysia. *Science (New York, N.Y)*  
726 167: 1745-1748.
- 727 13. Brunelli, M., V. Castellucci, and E. R. Kandel. 1976. Synaptic facilitation and behavioral  
728 sensitization in Aplysia: possible role of serotonin and cyclic AMP. *Science (New York, N.Y)* 194:  
729 1178-1181.
- 730 14. Glanzman, D. L., S. L. Mackey, R. D. Hawkins, A. M. Dyke, P. E. Lloyd, and E. R. Kandel. 1989.  
731 Depletion of serotonin in the nervous system of Aplysia reduces the behavioral enhancement of

- 732 gill withdrawal as well as the heterosynaptic facilitation produced by tail shock. *J Neurosci* 9:  
733 4200-4213.
- 734 15. Zhang, Y., H. Lu, and C. I. Bargmann. 2005. Pathogenic bacteria induce aversive olfactory  
735 learning in *Caenorhabditis elegans*. *Nature* 438: 179-184.
- 736 16. Azmitia, E. C. 2007. Serotonin and brain: evolution, neuroplasticity, and homeostasis. *Int Rev*  
737 *Neurobiol* 77: 31-56.
- 738 17. Fossat, P., J. Bacque-Cazenave, P. De Deurwaerdere, D. Cattaert, and J. P. Delbecq. 2015.  
739 Serotonin, but not dopamine, controls the stress response and anxiety-like behavior in the  
740 crayfish *Procambarus clarkii*. *J Exp Biol* 218: 2745-2752.
- 741 18. Hukema, R. K., S. Rademakers, and G. Jansen. 2008. Gustatory plasticity in *C. elegans* involves  
742 integration of negative cues and NaCl taste mediated by serotonin, dopamine, and glutamate.  
743 *Learn Mem* 15: 829-836.
- 744 19. Pocock, R., and O. Hobert. 2010. Hypoxia activates a latent circuit for processing gustatory  
745 information in *C. elegans*. *Nat Neurosci* 13: 610-614.
- 746 20. Qin, Y., X. Zhang, and Y. Zhang. 2013. A neuronal signaling pathway of CaMKII and Gqalpha  
747 regulates experience-dependent transcription of *tph-1*. *J Neurosci* 33: 925-935.
- 748 21. Tsui, D., and D. van der Kooy. 2008. Serotonin mediates a learned increase in attraction to high  
749 concentrations of benzaldehyde in aged *C. elegans*. *Learn Mem* 15: 844-855.
- 750 22. Ballestriero, F., J. Nappi, G. Zampi, P. Bazzicalupo, E. Di Schiavi, and S. Egan. 2016.  
751 *Caenorhabditis elegans* employs innate and learned aversion in response to bacterial toxic  
752 metabolites tambjamine and violacein. *Sci Rep* 6: 29284.
- 753 23. Curran, K. P., and S. H. Chalasani. 2012. Serotonin circuits and anxiety: what can invertebrates  
754 teach us? *Invert Neurosci* 12: 81-92.

- 755 24. Meisel, J. D., O. Panda, P. Mahanti, F. C. Schroeder, and D. H. Kim. 2014. Chemosensation of  
756 bacterial secondary metabolites modulates neuroendocrine signaling and behavior of *C.*  
757 *elegans*. *Cell* 159: 267-280.
- 758 25. Song, B. M., and L. Avery. 2012. Serotonin activates overall feeding by activating two separate  
759 neural pathways in *Caenorhabditis elegans*. *J Neurosci* 32: 1920-1931.
- 760 26. Song, B. M., S. Faumont, S. Lockery, and L. Avery. 2013. Recognition of familiar food activates  
761 feeding via an endocrine serotonin signal in *Caenorhabditis elegans*. *eLife* 2: e00329.
- 762 27. Ha, H. I., M. Hendricks, Y. Shen, C. V. Gabel, C. Fang-Yen, Y. Qin, D. Colón-Ramos, K. Shen, A. D.  
763 Samuel, and Y. Zhang. 2010. Functional organization of a neural network for aversive olfactory  
764 learning in *Caenorhabditis elegans*. *Neuron* 68: 1173-1186.
- 765 28. Harris, G., Y. Shen, H. Ha, A. Donato, S. Wallis, X. Zhang, and Y. Zhang. 2014. Dissecting the  
766 signaling mechanisms underlying recognition and preference of food odors. *J Neurosci* 34: 9389-  
767 9403.
- 768 29. Mohri-Shiomi, A., and D. A. Garsin. 2008. Insulin signaling and the heat shock response  
769 modulate protein homeostasis in the *Caenorhabditis elegans* intestine during infection. *J Biol*  
770 *Chem* 283: 194-201.
- 771 30. Singh, V., and A. Aballay. 2006. Heat-shock transcription factor (HSF)-1 pathway required for  
772 *Caenorhabditis elegans* immunity. *Proc Natl Acad Sci U S A* 103: 13092-13097.
- 773 31. Tan, M. W., and F. M. Ausubel. 2000. *Caenorhabditis elegans*: a model genetic host to study  
774 *Pseudomonas aeruginosa* pathogenesis. *Curr Opin Microbiol* 3: 29-34.
- 775 32. Tan, M. W., S. Mahajan-Miklos, and F. M. Ausubel. 1999. Killing of *Caenorhabditis elegans* by  
776 *Pseudomonas aeruginosa* used to model mammalian bacterial pathogenesis. *Proc Natl Acad Sci*  
777 *U S A* 96: 715-720.

- 778 33. Cox, C. D., and J. Parker. 1979. Use of 2-aminoacetophenone production in identification of  
779 *Pseudomonas aeruginosa*. *J Clin Microbiol* 9: 479-484.
- 780 34. Scott-Thomas, A. J., M. Syhre, P. K. Pattemore, M. Epton, R. Laing, J. Pearson, and S. T.  
781 Chambers. 2010. 2-Aminoacetophenone as a potential breath biomarker for *Pseudomonas*  
782 *aeruginosa* in the cystic fibrosis lung. *BMC Pulm Med* 10: 56.
- 783 35. Kapsetaki, S. E., I. Tzelepis, K. Avgousti, I. Livadaras, N. Garantonakis, K. Varikou, and Y.  
784 Apidianakis. 2014. The bacterial metabolite 2-aminoacetophenone promotes association of  
785 pathogenic bacteria with flies. *Nat Commun* 5: 4401.
- 786 36. Spurr, E. B., R. E. Porter, and C. Thomson. 2001. Palatability of bird repellents to *Rattus*  
787 *norvegicus*. *Pest Manag Sci* 57: 615-619.
- 788 37. Mason, J. R., D. L. Nolte, and B. P. Bryant. 1996. Effectiveness of thirteen vertebrate repellents  
789 as rodent trigeminal stimulants. *Physiol Behav* 60: 1449-1452.
- 790 38. Massai, F., F. Imperi, S. Quattrucci, E. Zennaro, P. Visca, and L. Leoni. 2011. A multitask biosensor  
791 for micro-volumetric detection of N-3-oxo-dodecanoyl-homoserine lactone quorum sensing  
792 signal. *Biosens Bioelectron* 26: 3444-3449.
- 793 39. Chase, D. L., and M. R. Koelle. 2007. Biogenic amine neurotransmitters in *C. elegans*.  
794 *WormBook : the online review of C. elegans biology*: 1-15.
- 795 40. Colbert, H. A., and C. I. Bargmann. 1997. Environmental signals modulate olfactory acuity,  
796 discrimination, and memory in *Caenorhabditis elegans*. *Learn Mem* 4: 179-191.
- 797 41. Hobert, O. 2003. Behavioral plasticity in *C. elegans*: paradigms, circuits, genes. *J Neurobiol* 54:  
798 203-223.
- 799 42. Jafari, G., Y. Xie, A. Kullyev, B. Liang, and J. Y. Sze. 2011. Regulation of extrasynaptic 5-HT by  
800 serotonin reuptake transporter function in 5-HT-absorbing neurons underscores adaptation  
801 behavior in *Caenorhabditis elegans*. *J Neurosci* 31: 8948-8957.

- 802 43. Sze, J. Y., M. Victor, C. Loer, Y. Shi, and G. Ruvkun. 2000. Food and metabolic signalling defects in  
803 a *Caenorhabditis elegans* serotonin-synthesis mutant. *Nature* 403: 560-564.
- 804 44. Isosaka, T., T. Matsuo, T. Yamaguchi, K. Funabiki, S. Nakanishi, R. Kobayakawa, and K.  
805 Kobayakawa. 2015. Htr2a-Expressing Cells in the Central Amygdala Control the Hierarchy  
806 between Innate and Learned Fear. *Cell* 163: 1153-1164.
- 807 45. Boehm, A. K., A. Saunders, J. Werner, and J. T. Lis. 2003. Transcription factor and polymerase  
808 recruitment, modification, and movement on dhsp70 in vivo in the minutes following heat  
809 shock. *Mol Cell Biol* 23: 7628-7637.
- 810 46. Guertin, M. J., and J. T. Lis. 2010. Chromatin landscape dictates HSF binding to target DNA  
811 elements. *PLoS Genet* 6: e1001114.
- 812 47. Petesch, S. J., and J. T. Lis. 2012. Activator-induced spread of poly(ADP-ribose) polymerase  
813 promotes nucleosome loss at Hsp70. *Mol Cell* 45: 64-74.
- 814 48. Ahn, S. G., P. C. Liu, K. Klyachko, R. I. Morimoto, and D. J. Thiele. 2001. The loop domain of heat  
815 shock transcription factor 1 dictates DNA-binding specificity and responses to heat stress. *Genes*  
816 *Dev* 15: 2134-2145.
- 817 49. Morano, K. A., and D. J. Thiele. 1999. Heat shock factor function and regulation in response to  
818 cellular stress, growth, and differentiation signals. *Gene Expr* 7: 271-282.
- 819 50. Li, J., L. Chauve, G. Phelps, R. M. Brielmann, and R. I. Morimoto. 2016. E2F coregulates an  
820 essential HSF developmental program that is distinct from the heat-shock response. *Genes Dev*  
821 30: 2062-2075.
- 822 51. Hajdu-Cronin, Y. M., W. J. Chen, and P. W. Sternberg. 2004. The L-type cyclin CYL-1 and the heat-  
823 shock-factor HSF-1 are required for heat-shock-induced protein expression in *Caenorhabditis*  
824 *elegans*. *Genetics* 168: 1937-1949.

- 825 52. Morton, E. A., and T. Lamitina. 2013. *Caenorhabditis elegans* HSF-1 is an essential nuclear  
826 protein that forms stress granule-like structures following heat shock. *Aging Cell* 12: 112-120.
- 827 53. Egecioglu, D., and J. H. Brickner. 2011. Gene positioning and expression. *Curr Opin Cell Biol* 23:  
828 338-345.
- 829 54. Rohner, S., V. Kalck, X. Wang, K. Ikegami, J. D. Lieb, S. M. Gasser, and P. Meister. 2013.  
830 Promoter- and RNA polymerase II-dependent hsp-16 gene association with nuclear pores in  
831 *Caenorhabditis elegans*. *J Cell Biol* 200: 589-604.
- 832 55. Becirovic, L., and I. R. Brown. 2017. Targeting of Heat Shock Protein HSPA6 (HSP70B') to the  
833 Periphery of Nuclear Speckles is Disrupted by a Transcription Inhibitor Following Thermal Stress  
834 in Human Neuronal Cells. *Neurochem Res* 42: 406-414.
- 835 56. Buckley, M. S., and J. T. Lis. 2014. Imaging RNA Polymerase II transcription sites in living cells.  
836 *Curr Opin Genet Dev* 25: 126-130.
- 837 57. Papantonis, A., and P. R. Cook. 2013. Transcription factories: genome organization and gene  
838 regulation. *Chem Rev* 113: 8683-8705.
- 839 58. Gurel, G., M. A. Gustafson, J. S. Pepper, H. R. Horvitz, and M. R. Koelle. 2012. Receptors and  
840 other signaling proteins required for serotonin control of locomotion in *Caenorhabditis elegans*.  
841 *Genetics* 192: 1359-1371.
- 842 59. Fortes-Marco, L., E. Lanuza, and F. Martinez-Garcia. 2013. Of pheromones and kairomones:  
843 what receptors mediate innate emotional responses? *Anat Rec (Hoboken)* 296: 1346-1363.
- 844 60. Groenhagen, U., R. Baumgartner, A. Bailly, A. Gardiner, L. Eberl, S. Schulz, and L. Weisskopf.  
845 2013. Production of bioactive volatiles by different *Burkholderia ambifaria* strains. *J Chem Ecol*  
846 39: 892-906.
- 847 61. Page, R. E., M. S. Blum, and H. M. Fales. 1988. o-Aminoacetophenone, a pheromone that repels  
848 honeybees (*Apis mellifera* L.). *Experientia* 44: 270-271.

- 849 62. Cooper, V. S., W. A. Carlson, and J. J. Lipuma. 2009. Susceptibility of *Caenorhabditis elegans* to  
850 *Burkholderia* infection depends on prior diet and secreted bacterial attractants. *PLoS One* 4:  
851 e7961.
- 852 63. Jolly, C., R. Morimoto, M. Robert-Nicoud, and C. Vourc'h. 1997. HSF1 transcription factor  
853 concentrates in nuclear foci during heat shock: relationship with transcription sites. *J Cell Sci* 110  
854 ( Pt 23): 2935-2941.
- 855 64. Jolly, C., Y. Usson, and R. I. Morimoto. 1999. Rapid and reversible relocalization of heat shock  
856 factor 1 within seconds to nuclear stress granules. *Proc Natl Acad Sci U S A* 96: 6769-6774.
- 857 65. Duarte, F. M., N. J. Fuda, D. B. Mahat, L. J. Core, M. J. Guertin, and J. T. Lis. 2016. Transcription  
858 factors GAF and HSF act at distinct regulatory steps to modulate stress-induced gene activation.  
859 *Genes Dev* 30: 1731-1746.
- 860 66. Zobeck, K. L., M. S. Buckley, W. R. Zipfel, and J. T. Lis. 2010. Recruitment timing and dynamics of  
861 transcription factors at the Hsp70 loci in living cells. *Mol Cell* 40: 965-975.
- 862 67. Jurivich, D. A., C. Pachetti, L. Qiu, and J. F. Welk. 1995. Salicylate triggers heat shock factor  
863 differently than heat. *J Biol Chem* 270: 24489-24495.
- 864 68. Feder, J. H., J. M. Rossi, J. Solomon, N. Solomon, and S. Lindquist. 1992. The consequences of  
865 expressing hsp70 in *Drosophila* cells at normal temperatures. *Genes Dev* 6: 1402-1413.
- 866 69. Morimoto, R. I. 1998. Regulation of the heat shock transcriptional response: cross talk between  
867 a family of heat shock factors, molecular chaperones, and negative regulators. *Genes Dev* 12:  
868 3788-3796.
- 869 70. Dai, C., L. Whitesell, A. B. Rogers, and S. Lindquist. 2007. Heat shock factor 1 is a powerful  
870 multifaceted modifier of carcinogenesis. *Cell* 130: 1005-1018.

- 871 71. Gidalevitz, T., A. Ben-Zvi, K. H. Ho, H. R. Brignull, and R. I. Morimoto. 2006. Progressive  
872 disruption of cellular protein folding in models of polyglutamine diseases. *Science (New York,*  
873 *N.Y 311: 1471-1474.*
- 874 72. Kamath, R. S., and J. Ahringer. 2003. Genome-wide RNAi screening in *Caenorhabditis elegans*.  
875 *Methods 30: 313-321.*
- 876 73. Wang, J., and M. M. Barr. 2005. RNA interference in *Caenorhabditis elegans*. *Methods Enzymol*  
877 *392: 36-55.*
- 878 74. Alcazar, R. M., R. Lin, and A. Z. Fire. 2008. Transmission dynamics of heritable silencing induced  
879 by double-stranded RNA in *Caenorhabditis elegans*. *Genetics 180: 1275-1288.*
- 880 75. Garvis, S., A. Munder, G. Ball, S. de Bentzmann, L. Wiehlmann, J. J. Ewbank, B. Tummler, and A.  
881 Filloux. 2009. *Caenorhabditis elegans* semi-automated liquid screen reveals a specialized role for  
882 the chemotaxis gene *cheB2* in *Pseudomonas aeruginosa* virulence. *PLoS Pathog 5: e1000540.*
- 883 76. Baugh, L. R., J. Demodena, and P. W. Sternberg. 2009. RNA Pol II accumulates at promoters of  
884 growth genes during developmental arrest. *Science (New York, N.Y 324: 92-94.*
- 885 77. Mukhopadhyay, A., B. Deplancke, A. J. Walhout, and H. A. Tissenbaum. 2008. Chromatin  
886 immunoprecipitation (ChIP) coupled to detection by quantitative real-time PCR to study  
887 transcription factor binding to DNA in *Caenorhabditis elegans*. *Nat Protoc 3: 698-709.*
- 888 78. Silva, M. C., M. D. Amaral, and R. I. Morimoto. 2013. Neuronal reprogramming of protein  
889 homeostasis by calcium-dependent regulation of the heat shock response. *PLoS Genet 9:*  
890 *e1003711.*

891

892 **Acknowledgments:** We would like to thank past and current members of the V.P. laboratory for  
893 comments and discussion, and in particular Matthew Wheat, Kat Dvorak and Charu Anbalagan for  
894 assistance with data generation. We would like to acknowledge Dr. Smolikove (University of Iowa) for



895 sharing protocols and advice, Dr. Yahr (University of Iowa) and Dr. Aballay (Duke University) for PA14  
896 strains, Dr. Ruvinsky (Northwestern University, Chicago) for helpful suggestions and advice,  
897 *Caenorhabditis* Genetics Center (funded by NIH Office of Research Infrastructure Programs (P40  
898 OD010440) for worm and bacterial strains. **Funding:** F.K.O was supported by V.P's grants, a graduate  
899 student fellowship from the Developmental Studies Hybridoma Bank (DSHB) and a scholarship from  
900 Glenn/AFAR Foundation. V.P. is funded by the National Institutes of Health (NIH R01 AG 050653) and  
901 The Lawrence Ellison Medical Foundation (AG-NS-1056-13). **Author contributions:** F.K.O. and V.P.  
902 designed the project and experiments, analyzed data and wrote the manuscript, F.K.O performed  
903 experiments. **Competing interests:** The authors declare that they have no competing interests. **Data and**  
904 **materials availability:** All worm strains, material and protocols will be made available on request  
905

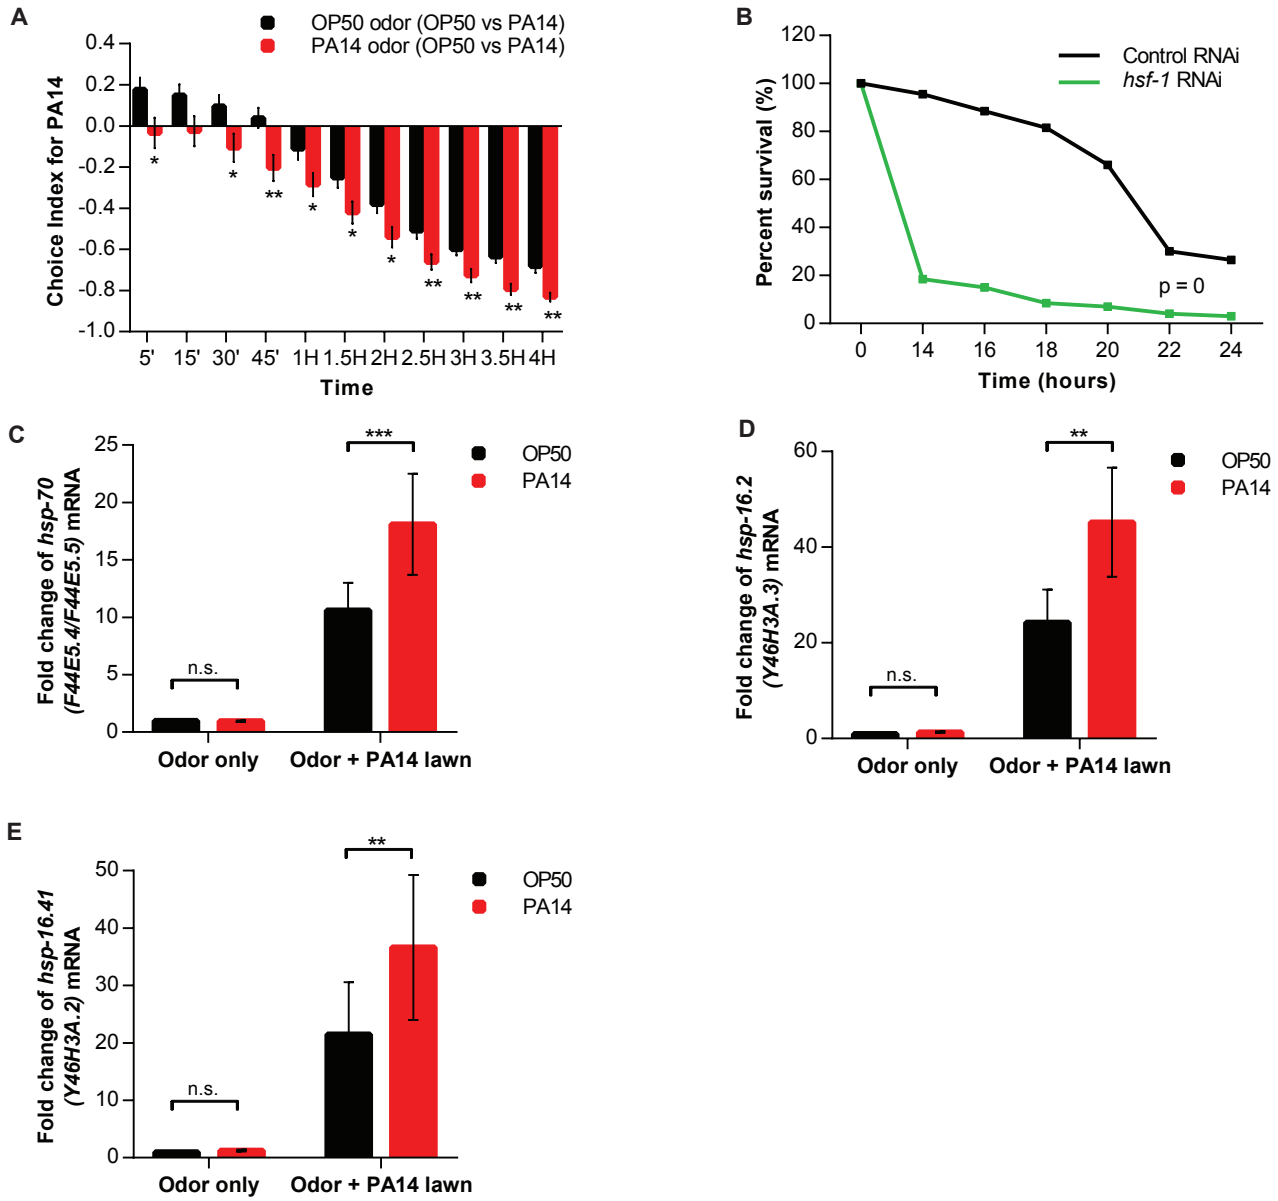

906 **Figure Legends**

907 **Fig. 1. Olfactory learning enhances HSF-1 activation.**

908 **(A)** Choice index for PA14 of wild-type animals pre-exposed to the odor of either OP50 or PA14.

909 Preference was recorded at the times indicated on the x-axis. N = 16-17 experiments of 30 animals per

910 condition. Student's paired t-test. \* $p < 0.05$ , \*\* $p < 0.01$ . Legends: pre-exposure conditions (choice). **(B)**

911 Survival on PA14 of 'control' animals and animals where *hsf-1* was knocked-down by RNAi. RNAi was

912 conducted using standard methods for feeding RNAi (see Materials and Methods). N = 3 experiments of

913 50 animals per condition. Log-rank test.  $p = 0$ . Also see Table S1. **(C–E)** *hsp-70* (F44E5.4/F44E5.5),

914 *hsp-16.2* (Y46H3A.3), and *hsp-16.41* (Y46H3A.2) mRNA abundance measured by qRT-PCR upon

915 exposing animals that had been trained on OP50 or PA14 odor to a lawn of PA14. Values were

916 normalized to wild-type animals pre-exposed to OP50 odor. N = 38 (C), 12 (D), and 10 (E) experiments

917 of 30 animals per condition. Pairwise mean comparison from linear mixed model analysis. \*\* $p < 0.01$ ,

918 \*\*\* $p < 0.001$ . See Materials and Methods and Table S2 for complete details. (A, C, D and E) Data

919 represent means  $\pm$  S.E.M.

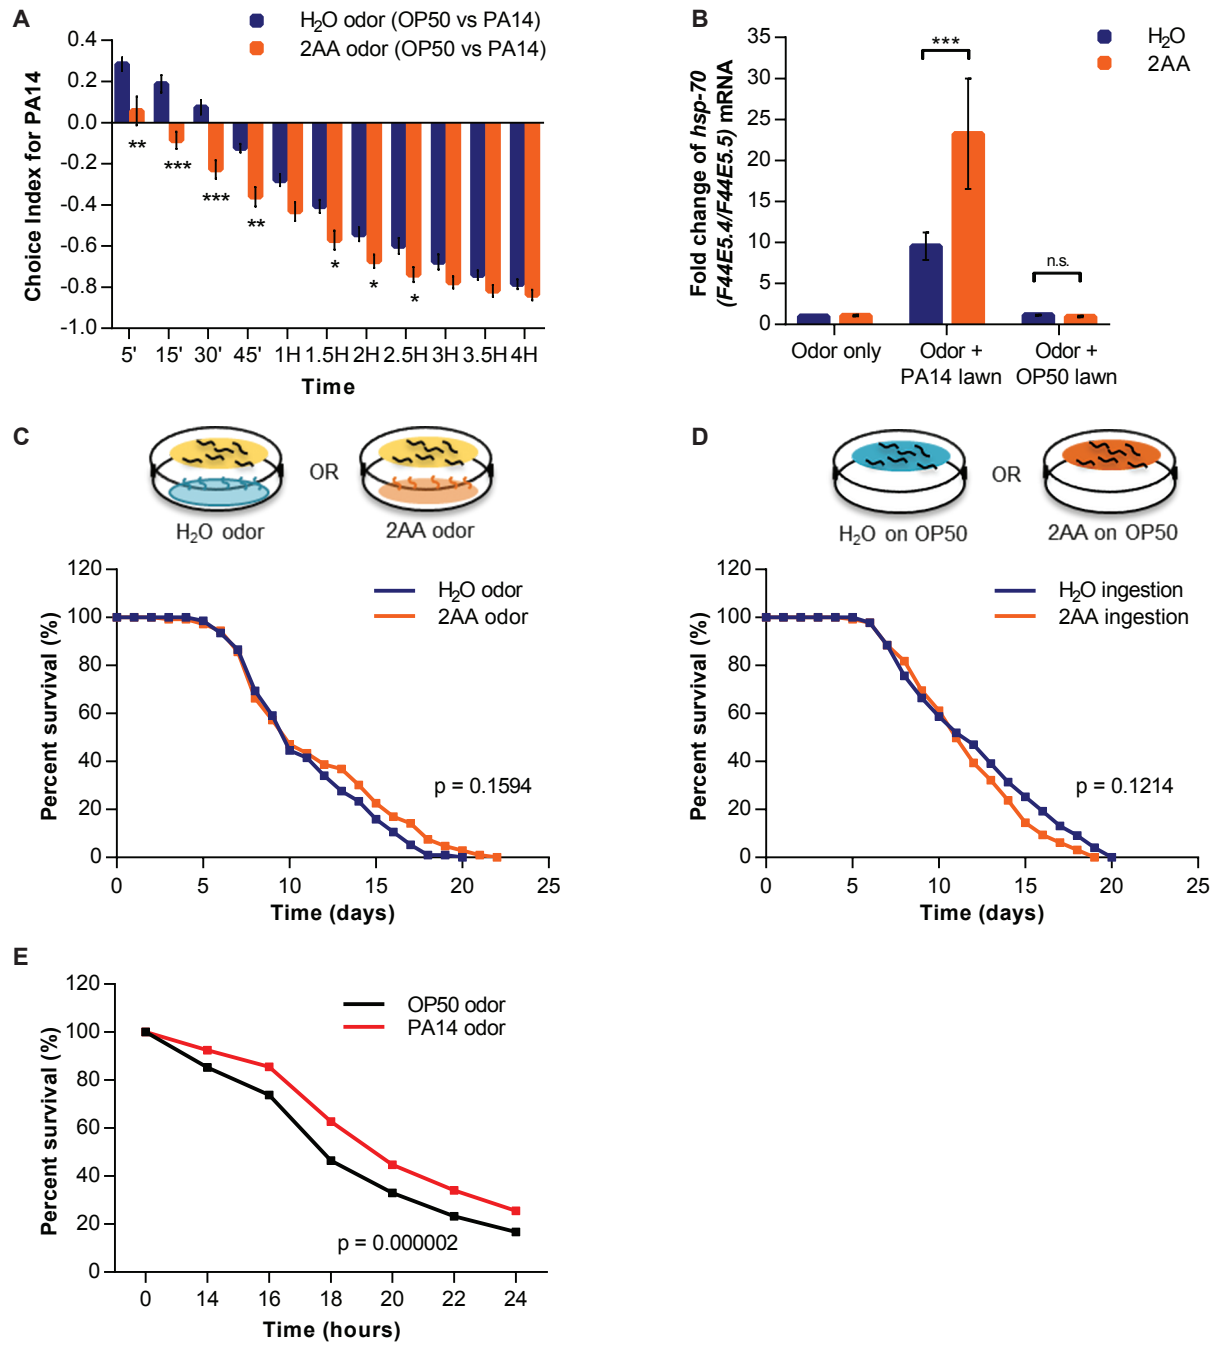

920 **Fig 2. The compound 2-aminoacetophenone (2AA) made by PA14 enhances olfactory avoidance**  
921 **behavior and HSF-1 activation.**

922 (A) Choice index of wild-type animals for PA14, following pre-exposure to the odor of either water or  
923 2AA. Preference was recorded at the times indicated on the x-axis. N = 10 experiments of 30 animals per  
924 condition. Student's t- test. \* $p < 0.05$ , \*\* $p < 0.01$ , \*\*\* $p < 0.001$ . (B) *hsp-70* (F44E5.4/F44E5.5) mRNA  
925 abundance measured by qRT-PCR in wild-type animals that were pre-exposed to water 'odor' or 2AA  
926 odor and subsequently placed on a PA14 or OP50 lawn. Values are relative to animals pre-exposed to  
927 water. N = 21 experiments of 30 animals per condition. Pairwise mean comparison from linear mixed  
928 model analysis. \*\*\* $p < 0.001$ . See Materials and Methods and Table S2 for complete details. (C) and (D)  
929 Lifespan curves of animals (C) continuously exposed to water (control) or 2AA odor, or (D) in physical  
930 contact with water-treated (control) or 2AA-treated OP50. N= 3 experiments of 50 animals per condition.  
931 Log-rank tests. No significance. See also Table S3 and Materials and Methods. (E) Survival of wild-type  
932 animals on PA14, following pre-exposure to OP50 or PA14 odor. N = 8 experiments of 50 animals per  
933 condition. Log-rank test.  $p < 0.001$ . Also see Table S4; (A, B) means  $\pm$  S.E.M, and (C-E) total animals  
934 across all experiments. Legends: pre-exposure conditions (choice).

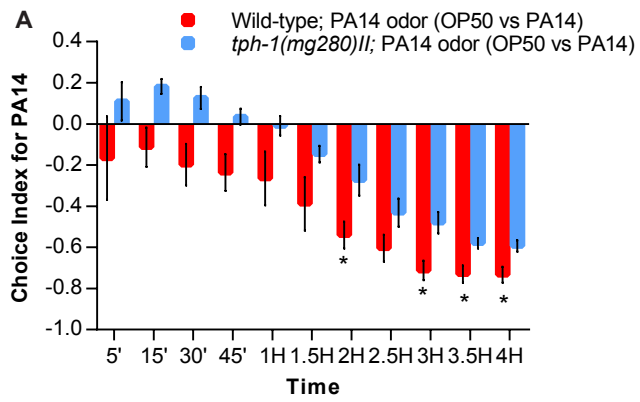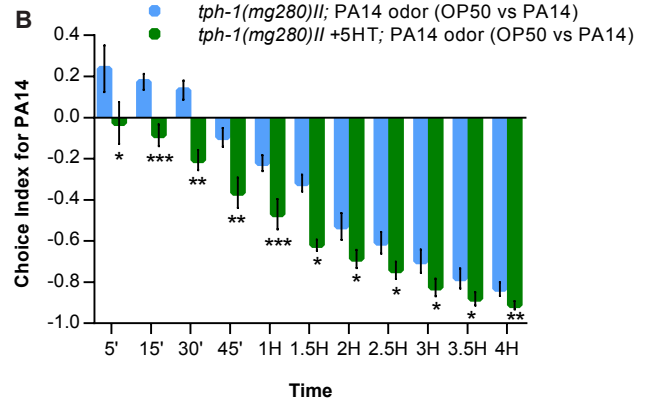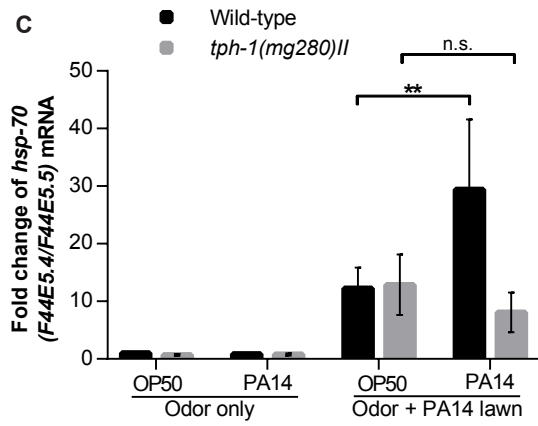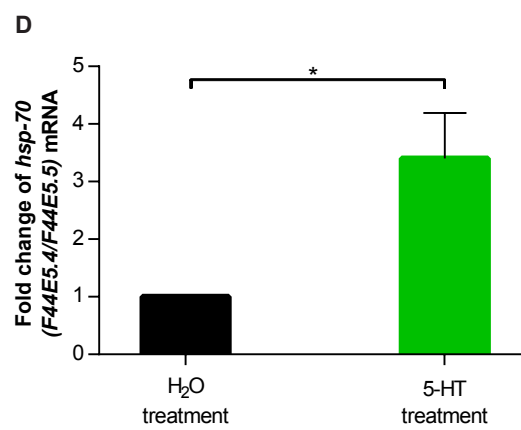

935 **Fig. 3. Serotonin is required for olfactory learning-mediated HSF-1 activation.**

936 (A) Choice index for PA14 of wild-type and *tph-1 (mg280) II* animals pre-exposed to the odor of PA14.  
937 Preference was recorded at times indicated (x-axis). N = 3-4 experiments of 30 animals per condition.  
938 Student's two-sample t-test (unequal variance) \* $p < 0.05$ . (B) Choice index for PA14 of *tph-1 (mg280) II*  
939 animals pre-exposed to the odor of PA14, compared to the choice indices in *tph-1 (mg280) II* animals  
940 treated with exogenous 5-HT (see Fig S3 for rescue), and pre-exposed to PA14 odor. Preference was  
941 recorded at times indicated (x-axis). N = 4 experiments of 30 animals per condition. Student's paired t-  
942 test. \* $p < 0.05$ , \*\* $p < 0.01$ , \*\*\* $p < 0.001$ . (C) *hsp-70* (F44E5.4/F44E5.5) mRNA abundance measured by  
943 qRT-PCR upon PA14 exposure in wild-type and *tph-1 (mg280) II* animals pre-exposed to OP50 or PA14.  
944 Values are relative to wild-type animals pre-exposed to the odor of OP50. N = 9 experiments of 30  
945 animals per condition. Pairwise mean comparison from linear mixed model analysis. \*\* $p < 0.01$  for wild-  
946 type (odor+PA14 lawn). No significance for *tph-1 (mg280) II* (odor+PA14 lawn). See Materials and  
947 Methods and Table S2 for complete details. (D) *hsp-70* (F44E5.4/F44E5.5) mRNA abundance measured  
948 by qRT-PCR following exposure of animals to exogenous 5-HT. Values are relative to control water-  
949 treated animals. N = 7 experiments of 20-30 animals per condition. Student's paired t-test. \* $p < 0.05$ .

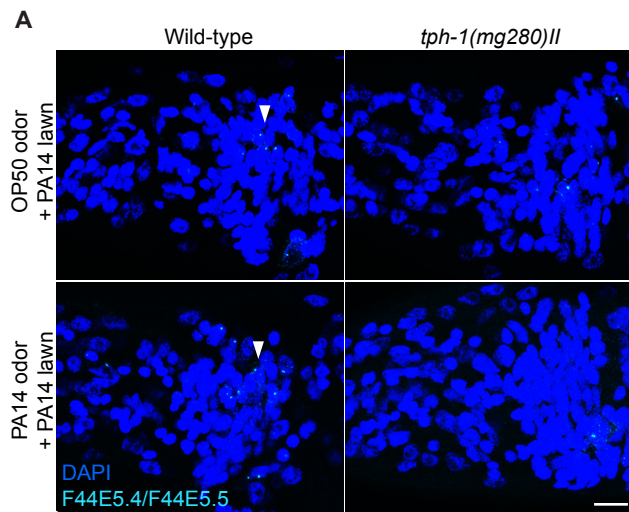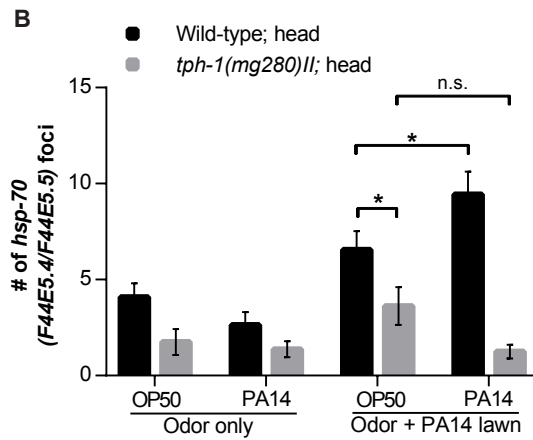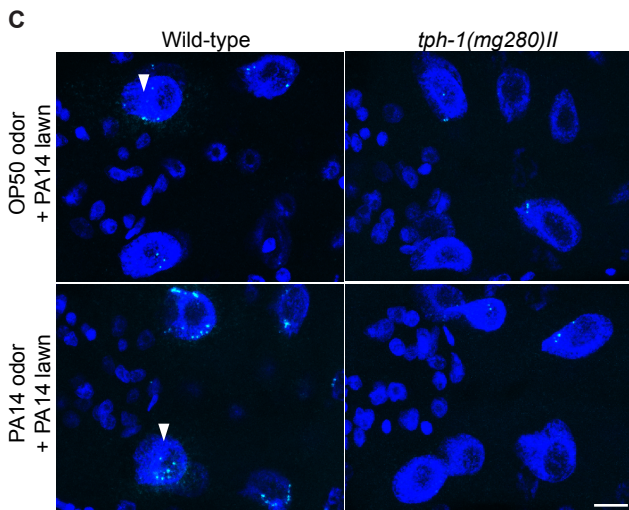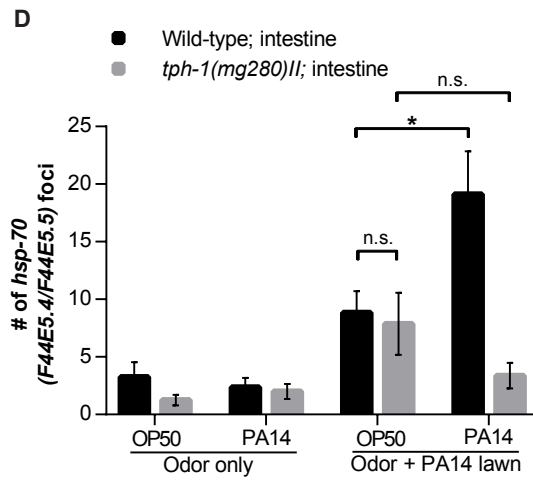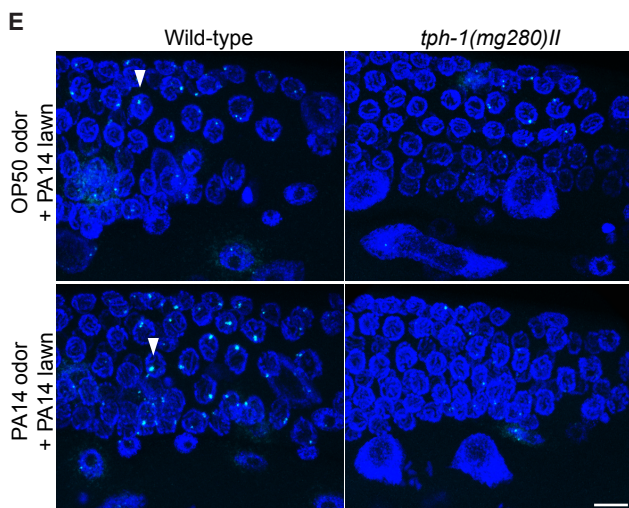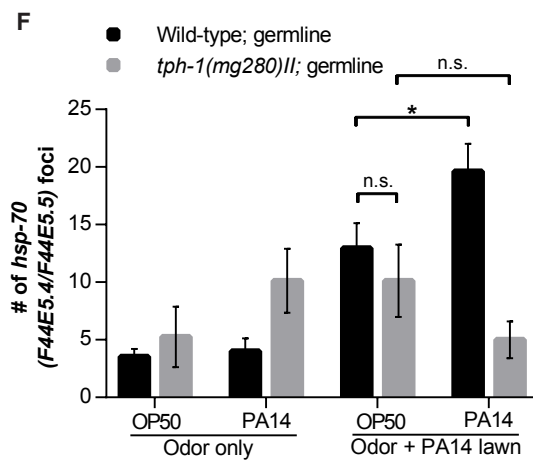



950 **Fig 4. Serotonin-mediated learning activates HSF-1 throughout the animal.**

951 (A-C) smFISH confocal micrographs showing *hsp-70* (F44E5.4/F44E5.5) mRNA and DAPI in wild-type  
952 and *tph-1 (mg280) II* animals pre-exposed to OP50 or PA14, and subsequently subjected to a PA14 lawn.  
953 Images are projected Z-stack images of 10  $\mu$ m sections across the (A) head, (C) intestine and (E)  
954 germline of animals. Arrowheads represent *hsp-70* (F44E5.4/F44E5.5) mRNA foci. Scale bars, 10 $\mu$ m. (B,  
955 D and F) Quantification of number of *hsp-70* (F44E5.4/F44E5.5) foci, in projected images. N = 8-11  
956 animals per tissue per genotype per condition, quantified from 2-3 independent experiments (see  
957 Materials and Methods). Student's paired t-test, \* $p < 0.05$  for wild-type (OP50 odor + PA14 lawn)  
958 compared to (PA14 odor + PA14 lawn). No significance for *tph-1 (mg280) II* (OP50 odor + PA14 lawn)  
959 compared to (PA14 odor + PA14 lawn). (A, B, D and F) Data represent means  $\pm$  S.E.M. (A) Legends:  
960 genotype; tissue.

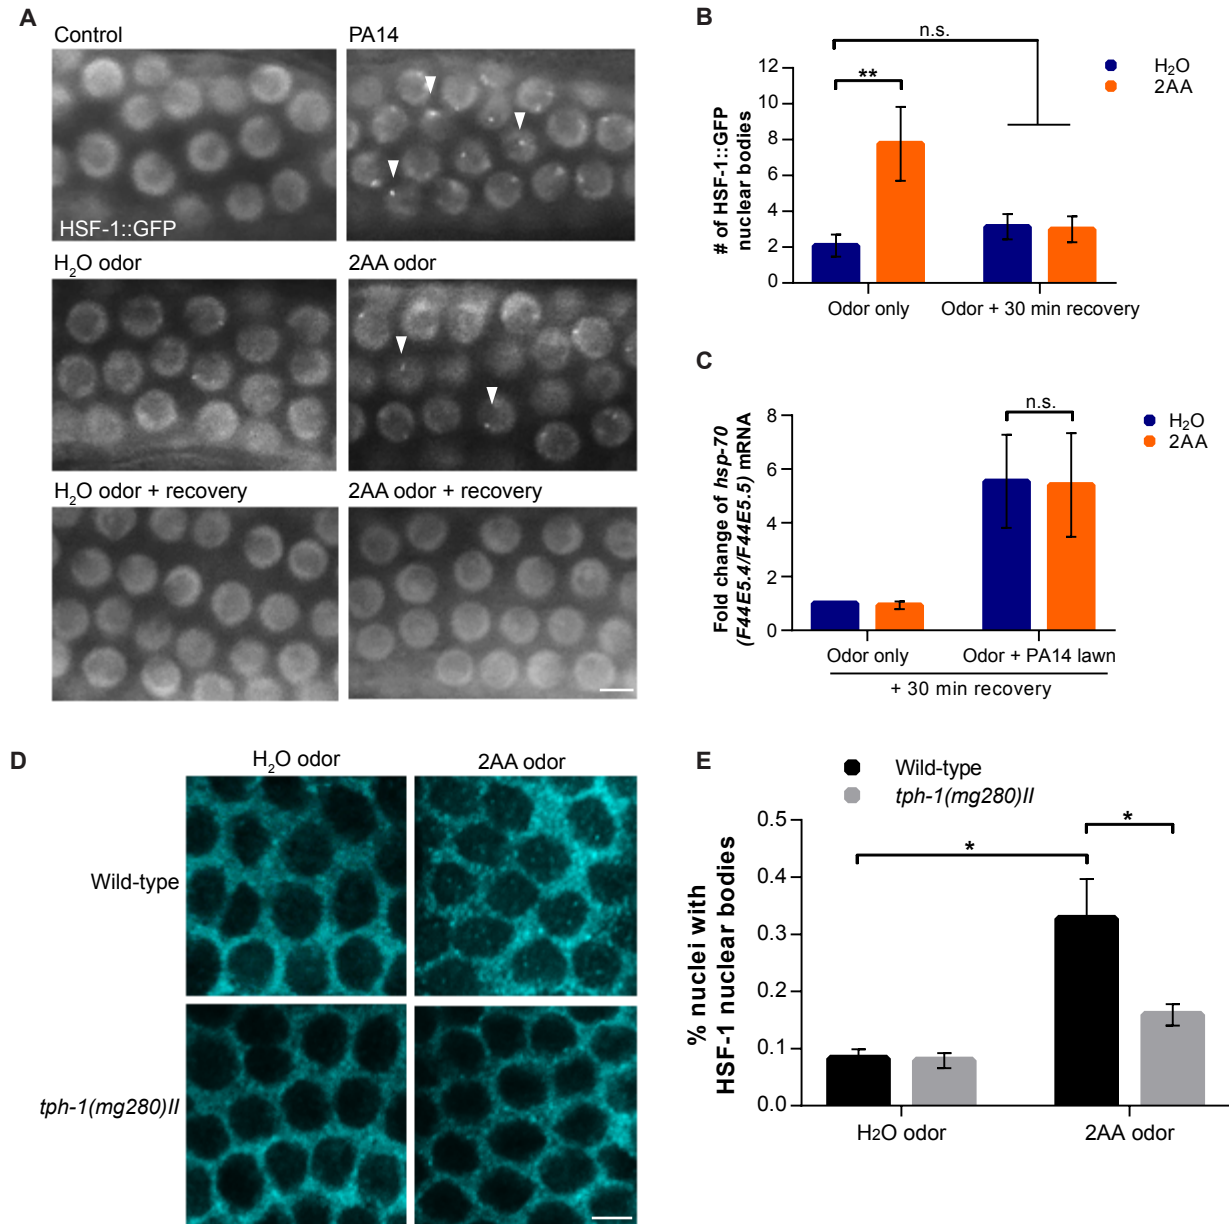

961 **Fig. 5. Olfactory learning primes HSF-1 through the formation of HSF-1 nuclear bodies.**

962 (A) HSF-1::GFP localization in germline nuclei: control animals at ambient temperature, animals on a

963 PA14 lawn, animals pre-exposed to water-odor or animals pre-exposed to 2AA odor, and animals allowed

964 a 30 minute recovery following pre-exposure to water-odor or 2AA odor. Arrowheads indicate HSF-1

965 nuclear bodies. Scale bar, 5 $\mu$ m. (B) Quantification of HSF-1 nuclear bodies under all conditions listed in

966 (A). N= 33-39 nuclei per animal, 17-25 animals per condition, across 3-4 independent experiments (See

967 materials and Methods). Student's two-sample t-test (unequal variance). \*\*p<0.01 for odor only. No

968 significance for (Odor + 30 min recovery) (C) *hsp-70* (F44E5.4/F44E5.5) mRNA abundance measured by

969 qRT-PCR following exposure of animals to the odor of water or 2AA and allowed to recover for 30

970 minutes on OP50 lawn before being placed on PA14 lawns. N=5-9 experiments of 30 animals per

971 experiment. Pairwise mean comparison from linear mixed model analysis. No significance. See Materials

972 and Methods and Table S2 for complete details. (D) Confocal micrographs of individual Z- sections

973 showing HSF-1 localization in germline nuclei of wild-type and *tph-1 (mg280) II* animals pre-exposed to

974 water-odor or pre-exposed to 2AA odor. Scale bar, 5 $\mu$ m (E) Quantification of HSF-1 nuclear bodies

975 under all conditions listed in (D). N = 50-55 nuclei per animal, 8-18 animals per condition, across 2-3

976 independent experiments (see Materials and Methods). Student's two-sample t-test (unequal variance) t-

977 test. \*p<0.05.

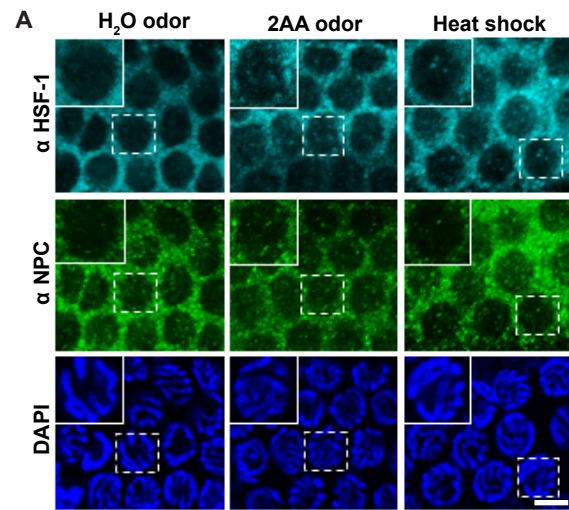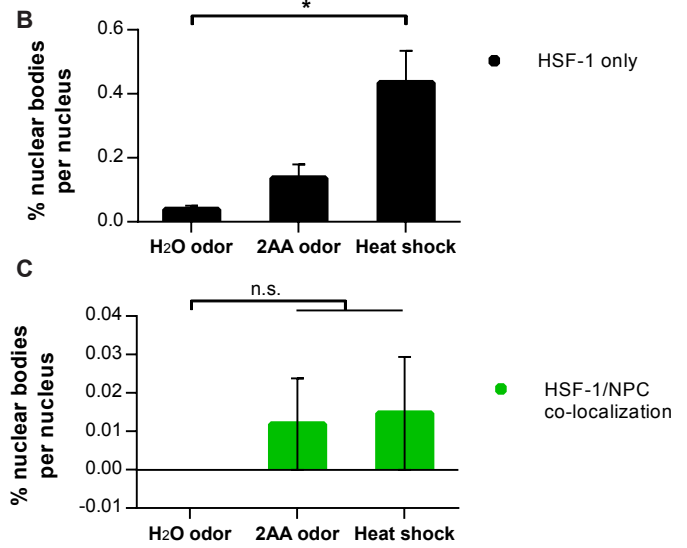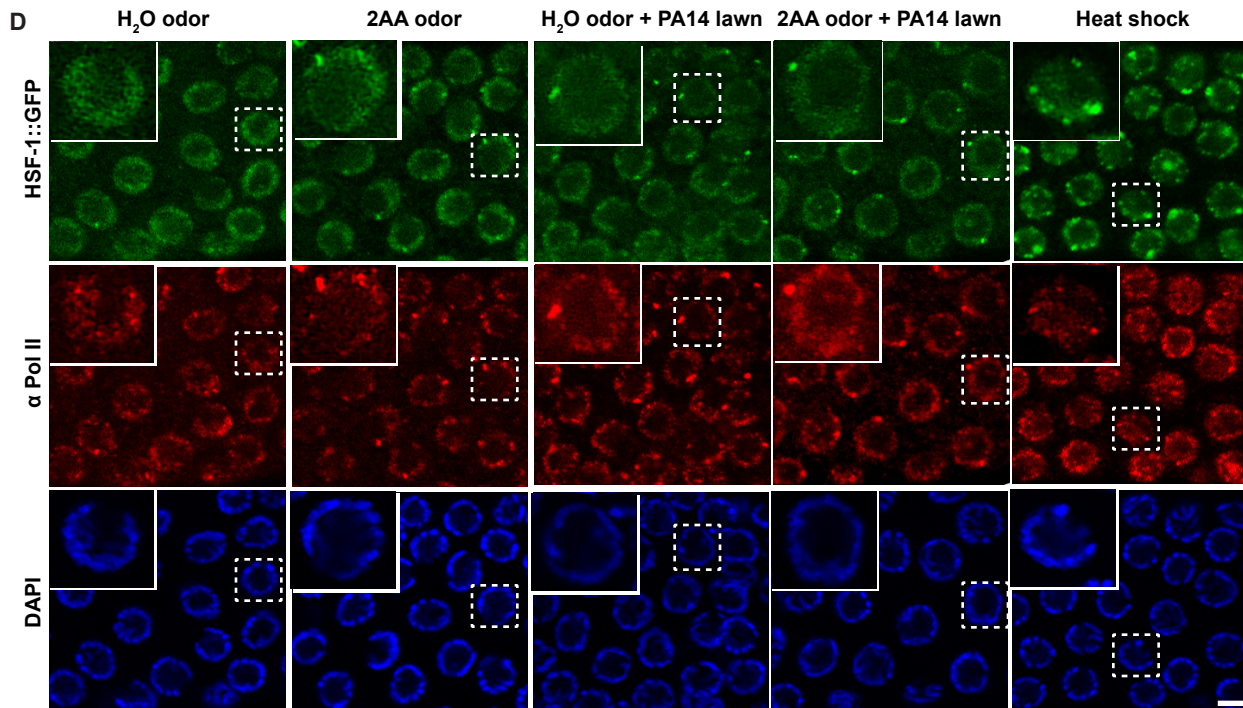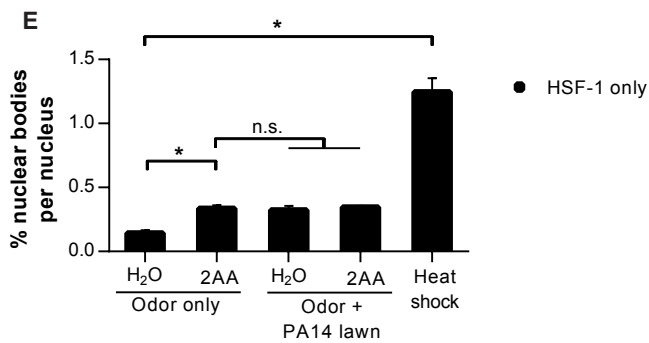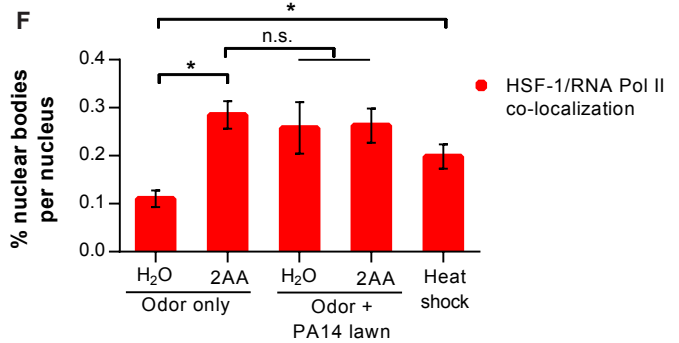

978 **Fig. 6. Olfactory learning primes HSF-1 by increasing its association with RNA Polymerase II.**

979 (A) Immunofluorescence confocal micrographs of HSF-1, Nuclear Pore Complex proteins (NPCs) and  
980 DAPI in germline nuclei of wild-type animals exposed to water-odor, 2AA odor and heat shock.  
981 Micrographs are individual Z-planes. Scale bar, 5 $\mu$ m. (B) Quantification of numbers of total HSF-1  
982 nuclear bodies per nucleus and (C) HSF-1 nuclear bodies per nucleus that co-localize with NPCs. N = 30-  
983 36 nuclei per animal, 4-6 animals per condition per experiment, 2 independent experiments (see Materials  
984 and Methods for details). Student's two-sample t- test (unequal variance). (B) \*p<0.05 when water odor  
985 compared to heat shock. (C) No significance between all conditions. (D) Immunofluorescence confocal  
986 micrographs of HSF-1, RNA Pol II and DAPI in germline nuclei of dissected animals expressing HSF-  
987 1::GFP upon exposure to water-odor, 2AA odor, water-odor and PA14 lawns, 2AA odor and PA14 lawns,  
988 and heat shock. Micrographs are individual Z-planes. Scale bar, 5 $\mu$ m. (E) Quantification of numbers of  
989 total HSF-1::GFP nuclear bodies per nucleus and (F) HSF-1 nuclear bodies per nucleus that co-localize  
990 with RNA Pol II in (D). N =number of nuclear bodies per nucleus in 68-82 nuclei per animal, 8-12  
991 animals per condition per experiment, 3 independent experiments. Student's two-sample t-test (unequal  
992 variance). \*p<0.05. (B, D and F) Data represent means  $\pm$  S.E.M.

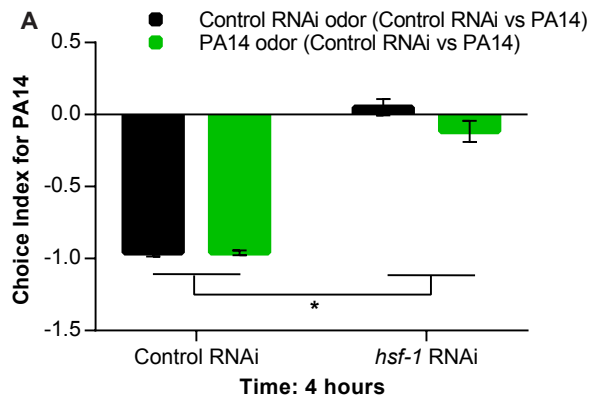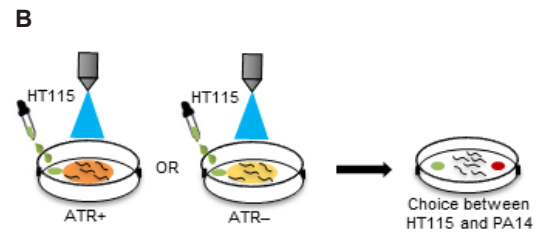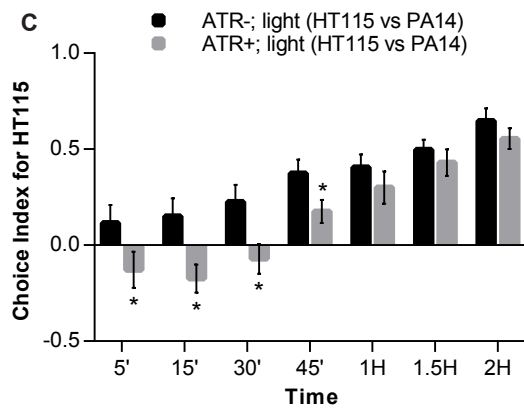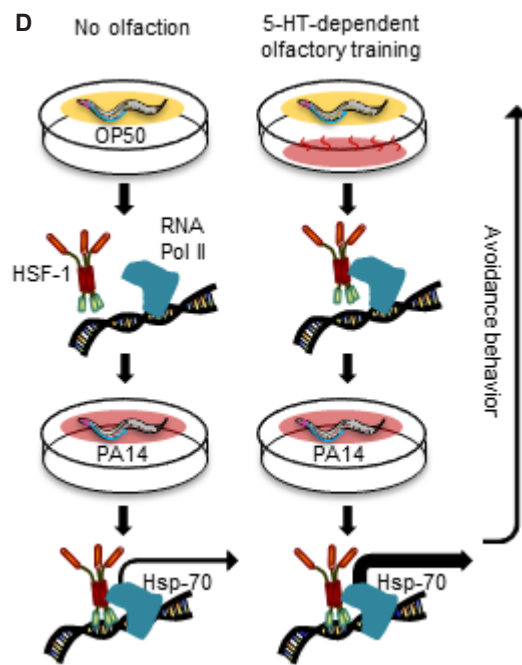

993 **Fig. 7. 5-HT signaling couples olfactory information with HSF-1 activation to mark sensory stimuli**  
994 **as threats.**

995 **(A)** Choice index for PA14 of wild-type animals subjected to control RNAi (empty vector), or *hsf-1*  
996 RNAi. Preference was recorded at time indicated (x-axis). N = 5-6 experiments of 30 animals per  
997 condition. Student's two-sample t-test (unequal variance). \* $p < 0.05$ . **(B)** Schematic of olfactory pre-  
998 exposure to HT115 odor in conjunction with optogenetic excitation of serotonergic neurons, followed by  
999 behavioral choice assay. ATR+ indicates the presence of all-*trans* retinal required for the light-induced  
1000 excitation of channelrhodopsin (expressed in the serotonergic neurons) necessary to release 5-HT. ATR-  
1001 indicates control-mock excited animals. **(C)** Choice index for HT115 in animals +/- ATR following  
1002 optogenetic excitation of serotonergic neurons. N = 6 experiments in triplicate of 10 animals per  
1003 condition. Student's paired t-test \* $p < 0.05$ . **(D)** Model: 5-HT-dependent olfactory learning facilitates the  
1004 association between RNA Pol II and HSF-1, resulting in enhanced avoidance behavior as well as  
1005 enhanced transcription of HSF-1 targets in a stressor-specific manner. (A and C) Data represent means  $\pm$   
1006 S.E.M. (A and C) Legends: pre-exposure condition (choice).
